# Supplementary material for: Bifunctional thiourea catalyzed asymmetric Michael addition of anthrone to methyleneindolinones
Source: Royal Society of Chemistry journal article supplement (doi:10.1039/c5ra21614a), 2016-01-01
Supplement: c5ra21614a1.pdf [file c5ra21614a1.pdf]

# **Bifunctional Thiourea Catalyzed Asymmetric Michael Addition of Anthrone to Methyleneindolinones**

Huaili Zhao<sup>a</sup>, Mingyan Xiao<sup>a</sup>, Lubin Xu<sup>a</sup>, Liang Wang<sup>a,b\*</sup> and Jian Xiao<sup>a,b\*</sup>

<sup>a</sup> College of Chemistry and Pharmaceutical Sciences, Qingdao Agricultural University, Qingdao, 266109, China.

<sup>b</sup> Open Project Program of Hubei Key Laboratory of Drug Synthesis and Optimization, Jingchu University of Technology (Nos. OPP2015YB01 and OPP2015ZD02)

## **Supporting Information**

### **CONTENTS**

|                                                             |            |
|-------------------------------------------------------------|------------|
| <b>1. General Methods.....</b>                              | <b>S2</b>  |
| <b>2. Experimental Procedures .....</b>                     | <b>S2</b>  |
| <b>3. Characterization of Products.....</b>                 | <b>S3</b>  |
| <b>4. <sup>1</sup>H and <sup>13</sup>C NMR Spectra.....</b> | <b>S9</b>  |
| <b>5. HPLC Spectra.....</b>                                 | <b>S20</b> |
| <b>6. X-Ray structures for 3d and 4g .....</b>              | <b>S31</b> |

## 1. General Methods

All the chemical reagents were purchased from commercial companies. All reactions were performed in flask and monitored by TLC (0.2 mm silica gel-coated HSGF 254 plate). The reaction mixtures were purified by flash column chromatography (200-300 mesh silica gel) eluted with the gradient of petroleum ether and ethyl acetate.

Proton nuclear magnetic resonance spectra ( $^1\text{H}$  NMR) were recorded on a Bruker AMX 500 spectrophotometer ( $\text{CDCl}_3$  as solvent). Chemical shifts were reported in ppm using tetramethylsilane (TMS,  $\delta$  (ppm) = 0.00 ppm) as the internal standard, and relative to the signal of chloroform-d ( $\delta$  7.26, singlet). The number of protons for a given resonance was indicated by nH. Coupling constants were reported as a  $J$  value in Hz. The following abbreviations were used to indicate the multiplicity: singlet (s), doublet (d), triplet (t), quartet (q), doublet of doublets (dd), and multiplet (m). Carbon nuclear magnetic resonance spectra ( $^{13}\text{C}$  NMR) were reported in ppm using solvent  $\text{CDCl}_3$  ( $\delta$  (ppm) = 77.17 ppm) as an internal standard. HRMS analyses were performed on a Waters XEVO QTOF mass spectrometer. X-ray structure for compounds was determined on X-ray single crystal diffractometer (Model Specifications: D8 QUEST). Specific rotations values were measured with a digital polarimeter (Model Specifications: P850A), equipped with a sodium lamp source (589.3 nm), at 25 °C in a 10 cm cell and the indicated solvent. The compounds 3-alkylideneindolin-2-ones **2** were prepared according the reported procedures.<sup>[1]</sup>

## 2. Experimental Procedures

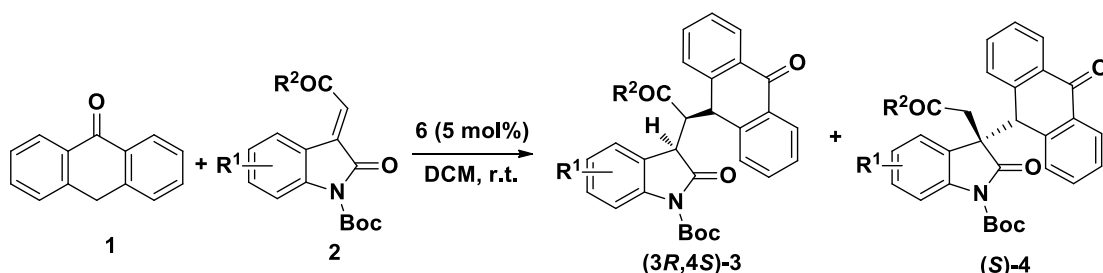

### General procedure for reaction of anthrone with methyleneindolinones

To a 10 mL flask with a magnetic bar, were added dichloromethane (2 mL), anthrone **1** (0.36 mmol), 3-alkylideneindolin-2-ones **2** (0.3 mmol) and chiral catalyst **6** (8.92 mg, 5 mol%). The mixture was then stirred at room temperature and monitored by TLC until **2** was consumed up. Then the solvent was removed *in vacuo*. The residue was purified by column chromatography on silica gel to afford the desired product **3** or **4**.

### References

<sup>[1]</sup> G. Wang, X. Liu, T. Huang, Y. Kuang, L. Lin, X. Feng, *Org. Lett.*, **2013**, *15*, 76.

### 3. Characterization of Products

#### (*R*)-tert-butyl-3-((*S*)-2-ethoxy-2-oxo-1-(10-oxo-9,10-dihydroanthracen-9-yl)ethyl)-2-oxoindoline-1-carboxylate (**3a**)

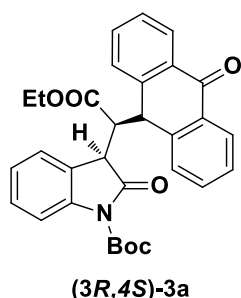

white solid, melting point 182-184 °C, yield 95%;

**major isomer:**  $^1\text{H NMR}$  (500 MHz,  $\text{CDCl}_3$ )  $\delta$  8.22 (ddd,  $J = 7.6, 7.1, 4.7$  Hz, 2H), 8.10 (d,  $J = 7.6$  Hz, 1H), 7.72 (d,  $J = 8.2$  Hz, 1H), 7.58-7.53 (m, 1H), 7.52-7.41 (m, 3H), 7.38-7.33 (m, 1H), 7.21 (t,  $J = 7.9$  Hz, 1H), 6.97 (t,  $J = 7.5$  Hz, 1H), 6.87 (d,  $J = 7.6$  Hz, 1H), 5.40 (d,  $J = 10.4$  Hz, 1H), 3.69-3.63 (m, 1H), 3.61 (d,  $J = 4.1$  Hz, 1H), 3.53-3.45 (m, 1H), 2.95 (dd,  $J = 10.4, 4.1$  Hz, 1H), 1.70 (s, 9H), 0.69 (t,  $J = 7.1$  Hz, 3H).  $^{13}\text{C NMR}$  (125 MHz,  $\text{CDCl}_3$ )  $\delta$  185.5, 174.0, 170.5, 149.1, 142.7, 142.6, 140.3, 133.2, 133.1, 132.4, 129.6, 128.7, 128.6, 128.4, 128.2, 128.0, 124.9, 124.2, 123.7, 115.2, 84.6, 61.3, 60.8, 44.4, 41.6, 28.3, 13.6.

**HRMS (ESI)** calcd. for  $\text{C}_{31}\text{H}_{29}\text{NO}_6\text{Na}$ ,  $[\text{M}+\text{Na}]$ : 534.1893; found: 534.1898.

#### (*R*)-tert-butyl 4-chloro-3-((*S*)-2-ethoxy-2-oxo-1-(10-oxo-9,10-dihydroanthracen-9-yl)ethyl)-2-oxoindoline-1-carboxylate (**3b**)

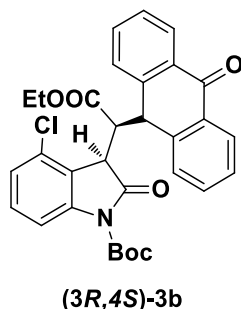

white solid, melting point 84-86 °C, yield 93%;

**major isomer:**  $^1\text{H NMR}$  (500 MHz,  $\text{CDCl}_3$ )  $\delta$  8.26 (d,  $J = 7.6$  Hz, 1H), 8.20 (dd,  $J = 8.4, 4.7$  Hz, 2H), 7.67 (d,  $J = 8.2$  Hz, 1H), 7.59 (t,  $J = 7.4$  Hz, 1H), 7.52 (t,  $J = 7.4$  Hz, 1H), 7.46-7.38 (m, 2H), 7.37-7.31 (m, 1H), 7.15 (t,  $J = 8.2$  Hz, 1H), 6.92 (d,  $J = 8.1$  Hz, 1H), 5.33 (d,  $J = 10.9$  Hz, 1H), 3.67 (d,  $J = 3.8$  Hz, 1H), 3.66-3.59 (m, 1H), 3.48 (dd,  $J = 10.9, 3.9$  Hz, 1H), 3.45-3.38 (m, 1H), 1.71 (s, 9H), 0.63 (t,  $J = 7.1$  Hz, 3H).  $^{13}\text{C NMR}$  (125 MHz,  $\text{CDCl}_3$ )  $\delta$  185.3, 172.7, 170.3, 148.9, 142.6, 142.4, 141.7, 133.1, 132.9, 132.2, 130.3, 129.9, 129.61, 128.4, 128.3, 128.1, 127.9, 127.8, 124.8, 122.6, 113.4, 84.8, 77.2, 60.6, 58.7, 44.5, 41.4, 28.2, 13.4.

**HRMS (ESI):** calcd. for  $\text{C}_{31}\text{H}_{28}\text{NO}_6\text{NaCl}$ ,  $[\text{M}+\text{Na}]$ : 568.1503; found: 568.1504.

**(R)-tert-butyl 4-chloro-3-((S)-2-methoxy-2-oxo-1-(10-oxo-9,10-dihydroanthracen-9-yl)ethyl)-2-oxindoline-1-carboxylate (3c)**

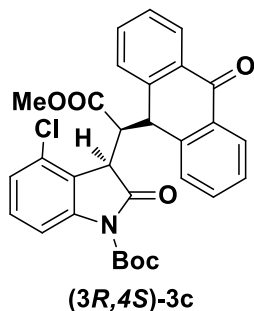

yellow solid, melting point 95-97 °C, yield 96%;

**major isomer:**  $^1\text{H NMR}$  (500 MHz,  $\text{CDCl}_3$ )  $\delta$  8.26 (d,  $J = 7.8$  Hz, 1H), 8.23-8.15 (m, 2H), 7.68 (d,  $J = 8.2$  Hz, 1H), 7.61-7.56 (m, 1H), 7.55-7.39 (m, 4H), 7.15 (q,  $J = 8.1$  Hz, 1H), 6.93 (d,  $J = 8.1$  Hz, 1H), 5.34 (d,  $J = 10.9$  Hz, 1H), 3.69 (d,  $J = 3.8$  Hz, 1H), 3.51 (dd,  $J = 10.8, 3.9$  Hz, 1H), 3.04 (s, 3H), 1.71 (s, 9H).  $^{13}\text{C NMR}$  (125 MHz,  $\text{CDCl}_3$ )  $\delta$  185.0, 172.5, 170.7, 148.7, 142.4, 142.2, 141.5, 132.9, 132.7, 132.0, 130.0, 129.8, 129.4, 128.2, 128.0, 127.9, 127.8, 127.7, 124.7, 122.3, 113.3, 84.6, 58.5, 51.3, 44.2, 41.4, 28.0.

**HRMS (ESI):** calcd. for  $\text{C}_{30}\text{H}_{26}\text{NO}_6\text{NaCl}$ ,  $[\text{M}+\text{Na}]$ : 554.1346; found: 554.1350.

**(R)-tert-butyl 4-chloro-2-oxo-3-((S)-2-oxo-1-(10-oxo-9,10-dihydroanthracen-9-yl)-2-phenylethyl)indoline-1-carboxylate (3d)**

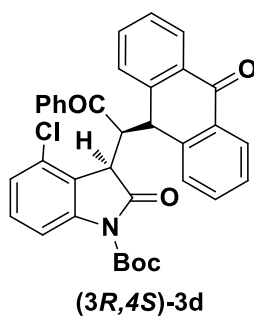

yellow solid, melting point 95-97 °C, yield 60%;

**major isomer:**  $^1\text{H NMR}$  (500 MHz,  $\text{CDCl}_3$ )  $\delta$  8.32 (dd,  $J = 13.8, 7.6$  Hz, 2H), 8.02 (d,  $J = 7.5$  Hz, 1H), 7.65-7.51 (m, 3H), 7.20 (t,  $J = 7.3$  Hz, 1H), 7.13-6.97 (m, 8H), 6.66 (d,  $J = 8.1$  Hz, 1H), 5.44 (d,  $J = 10.6$  Hz, 1H), 4.60 (dd,  $J = 10.7, 3.8$  Hz, 1H), 3.71 (d,  $J = 3.7$  Hz, 1H), 1.75 (s, 9H).  $^{13}\text{C NMR}$  (125 MHz,  $\text{CDCl}_3$ )  $\delta$  200.1, 185.4, 173.2, 149.0, 143.1, 142.0, 141.6, 136.8, 133.1, 132.9, 132.8, 132.3, 132.2, 129.8, 129.6, 129.5, 128.3, 128.0, 127.9, 127.7, 127.5, 127.4, 124.4, 122.6, 113.6, 84.7, 58.5, 45.0, 42.8, 28.2.

**HRMS (ESI)** calcd. for  $\text{C}_{35}\text{H}_{28}\text{NO}_5\text{NaCl}$ ,  $[\text{M}+\text{Na}]$ : 600.1554; found: 600.1552.

**(R)-tert-butyl 4-bromo-2-oxo-3-((S)-2-oxo-1-(10-oxo-9,10-dihydroanthracen-9-yl)-2-phenylethyl)indoline-1-carboxylate (3e)**

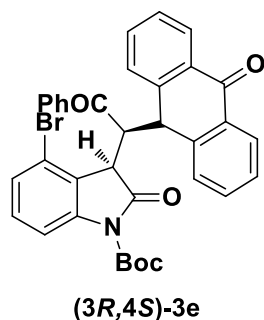

yellow solid, melting point 95-97 °C, yield 54%;

**major isomer:**  $^1\text{H NMR}$  (500 MHz,  $\text{CDCl}_3$ )  $\delta$  8.31 (t,  $J = 8.2$  Hz, 2H), 8.04 (d,  $J = 7.5$  Hz, 1H), 7.63 (dd,  $J = 6.9, 4.7$  Hz, 2H), 7.58-7.50 (m, 1H), 7.24-6.96 (m, 8H), 6.89 (t,  $J = 8.1$  Hz, 1H), 6.84 (d,  $J = 8.0$  Hz, 1H), 5.42 (d,  $J = 10.6$  Hz, 1H), 4.68 (dd,  $J = 10.7, 3.6$  Hz, 1H), 3.65 (d,  $J = 3.4$  Hz, 1H), 1.75 (s, 9H).  $^{13}\text{C NMR}$  (125MHz,  $\text{CDCl}_3$ )  $\delta$  200.2, 185.7, 173.2, 149.1, 143.2, 142.2, 141.8, 137.1, 133.3, 133.2, 132.9, 132.4, 130.1, 129.7, 128.3, 128.2, 128.0, 127.8, 127.6, 124.7, 118.3, 114.2, 84.8, 58.7, 46.4, 43.0, 28.3.

**HRMS (ESI)** calcd. for  $\text{C}_{35}\text{H}_{28}\text{NO}_5\text{NaBr}$ ,  $[\text{M}+\text{Na}]$ : 644.1049; found: 644.1038.

**(S)-tert-butyl 2-oxo-3-(2-oxo-2-phenylethyl)-3-(10-oxo-9,10-dihydroanthracen-9-yl)indoline-1-carboxylate (4f)**

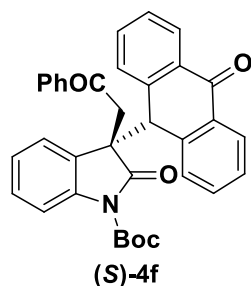

yellow solid, melting point 182-185 °C, yield 60%;  $[\alpha]_{\text{D}}^{25} = +2.94$  ( $\lambda$  589.3nm,  $c$  0.68,  $\text{CH}_3\text{OH}$ ).

$^1\text{H NMR}$  (500 MHz,  $\text{CDCl}_3$ )  $\delta$  8.16 (d,  $J = 7.7$  Hz, 1H), 7.78-7.70 (m, 5H), 7.63-7.48 (m, 3H), 7.44-7.36 (m, 4H), 7.30 (t,  $J = 7.6$  Hz, 1H), 7.18-7.10 (m, 1H), 6.78 (t,  $J = 7.5$  Hz, 1H), 5.93 (d,  $J = 7.2$  Hz, 1H), 4.68 (s, 1H), 4.09 (d,  $J = 17.9$  Hz, 1H), 3.70 (d,  $J = 17.8$  Hz, 1H), 1.59 (s, 9H).  $^{13}\text{C NMR}$  (125MHz,  $\text{CDCl}_3$ )  $\delta$  194.8, 183.8, 178.1, 148.2, 140.5, 138.7, 137.6, 135.9, 135.6, 133.7, 133.6, 131.6, 131.4, 129.6, 129.3, 129.0, 128.8, 128.7, 128.1, 128.0, 127.4, 126.4, 125.6, 123.8, 114.7, 83.9, 55.8, 52.2, 45.8, 28.3.

**HRMS (ESI)** calcd. for  $\text{C}_{35}\text{H}_{29}\text{NO}_5\text{Na}$ ,  $[\text{M}+\text{Na}]$ : 566.1943; found 566.1940.

**(S)-tert-butyl 3-(2-(4-chlorophenyl)-2-oxoethyl)-2-oxo-3-(10-oxo-9,10-dihydroanthracen-9-yl)indoline-1-carboxylate (4g)**

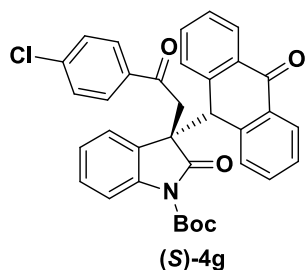

yellow solid, melting point 121-123 °C, yield 50%;  $[\alpha]_D^{25} = -2.85$  ( $\lambda$  589.3nm,  $c$  0.391, CH<sub>3</sub>OH).

**<sup>1</sup>H NMR** (500 MHz, CDCl<sub>3</sub>)  $\delta$  8.16 (d,  $J = 7.7$  Hz, 1H), 7.76 (d,  $J = 7.6$  Hz, 1H), 7.70 (t,  $J = 7.9$  Hz, 4H), 7.62-7.57 (m, 1H), 7.54 (d,  $J = 7.6$  Hz, 1H), 7.42 (t,  $J = 7.5$  Hz, 1H), 7.37 (t,  $J = 9.0$  Hz, 3H), 7.30 (t,  $J = 7.5$  Hz, 1H), 7.15 (t,  $J = 7.8$  Hz, 1H), 6.79 (t,  $J = 7.5$  Hz, 1H), 5.92 (d,  $J = 7.4$  Hz, 1H), 4.68 (s, 1H), 4.07 (d,  $J = 17.9$  Hz, 1H), 3.64 (d,  $J = 17.9$  Hz, 1H), 1.59 (s, 9H). **<sup>13</sup>C NMR** (125 MHz, CDCl<sub>3</sub>)  $\delta$  193.7, 183.7, 178.0, 148.1, 140.5, 140.1, 138.5, 137.5, 135.5, 134.2, 133.5, 132.3, 131.6, 131.4, 129.5, 129.4, 129.3, 129.0, 128.9, 128.7, 128.6, 128.0, 127.3, 126.7, 126.3, 125.5, 123.8, 123.7, 114.6, 83.9, 55.8, 52.1, 45.6, 28.2.

**HRMS (ESI):** calcd. for C<sub>35</sub>H<sub>28</sub>NO<sub>5</sub>NaCl, [M+Na]: 600.1554; found: 600.1552.

**tert-butyl (S)-5-methyl-2-oxo-3-(2-oxo-2-phenylethyl)-3-(10-oxo-9,10-dihydroanthracen-9-yl)indoline-1-carboxylate (4h)**

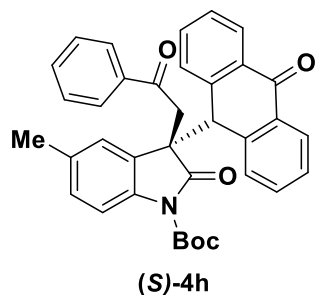

White solid, melting point 173-175 °C, yield 57%;  $[\alpha]_D^{25} = -14.01$  ( $\lambda$  589.3nm,  $c$  0.666, CH<sub>3</sub>OH).

**<sup>1</sup>H NMR** (500 MHz, CDCl<sub>3</sub>):  $\delta$  8.18 (d,  $J = 7.6$  Hz, 1H), 7.78 (d,  $J = 7.4$  Hz, 2H), 7.73 (d,  $J = 4.6$  Hz, 3H), 7.60 (m, 1H), 7.52 (t,  $J = 6.9$  Hz, 2H), 7.40 (t,  $J = 7.7$  Hz, 3H), 7.28 (t,  $J = 7.6$  Hz, 1H), 7.23 (d,  $J = 8.3$  Hz, 1H), 6.92 (d,  $J = 8.2$  Hz, 1H), 5.64 (s, 1H), 4.67 (s, 1H), 4.09 (d,  $J = 23.2$  Hz, 1H), 3.64 (d,  $J = 17.9$  Hz, 1H), 2.06 (s, 3H), 1.58 (s, 9H).

**<sup>13</sup>C NMR** (125 MHz, CDCl<sub>3</sub>)  $\delta$  194.7, 183.5, 178.2, 148.3, 138.8, 138.0, 137.7, 136.0, 135.9, 133.6, 133.6, 133.4, 131.5, 131.4, 129.7, 129.3, 1289.0, 128.7, 128.1, 128.0, 127.0, 126.3, 125.5, 124.7, 114.4, 83.7, 55.8, 52.3, 45.6, 28.3, 27.0, 20.9.

**HRMS (ESI):** Calcd. for C<sub>36</sub>H<sub>31</sub>NO<sub>5</sub>Na, [M+Na]: 580.2100; Found: 580.2097.

**tert-butyl (S)-5-methoxy-2-oxo-3-(2-oxo-2-phenylethyl)-3-(10-oxo-9,10-dihydroanthracen-9-yl)indoline-1-carboxylate (4i)**

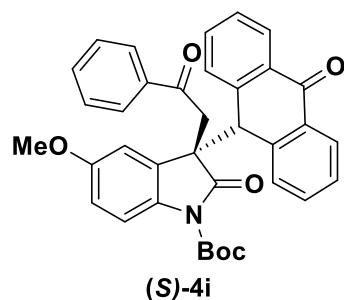

White solid, melting point 187-190 °C, yield 71%;  $[\alpha]_D^{25} = -5.22$  ( $\lambda$  589.3nm,  $c$  0.421, CH<sub>3</sub>OH).

**<sup>1</sup>H NMR (500 MHz, CDCl<sub>3</sub>):**  $\delta$  8.19 (d,  $J = 7.7$  Hz, 1H), 7.77 (d,  $J = 7.7$  Hz, 3H), 7.73 (d,  $J = 4.0$  Hz, 2H), 7.60 (dt,  $J = 8.1, 4.2$  Hz, 1H), 7.53 (t,  $J = 6.8$  Hz, 2H), 7.40 (t,  $J = 7.6$  Hz, 3H), 7.32 – 7.27 (m, 2H), 6.65 (dd,  $J = 8.9, 2.4$  Hz, 1H), 5.50 (d,  $J = 2.3$  Hz, 1H), 4.68 (s, 1H), 4.09 (d,  $J = 17.9$  Hz, 1H), 3.61 (d,  $J = 17.9$  Hz, 1H), 3.58 (s, 3H), 1.58 (s, 9H).

**<sup>13</sup>C NMR (125 MHz, CDCl<sub>3</sub>):**  $\delta$  194.7, 183.8, 178.1, 156.0, 148.3, 138.7, 137.7, 136.0, 135.8, 133.8, 133.7, 131.6, 131.4, 129.8, 128.9, 128.8, 128.8, 128.1, 128.0, 127.2, 126.8, 126.4, 115.7, 114.6, 110.3, 83.7, 55.8, 55.6, 52.2, 45.8, 28.3.

**HRMS (ESI):** Calcd. for C<sub>36</sub>H<sub>31</sub>NO<sub>6</sub>, [M+Na]: 596.2049; Found: 596.2048.

**ethyl (S)-2-oxo-3-(2-oxo-2-phenylethyl)-3-(10-oxo-9,10-dihydroanthracen-9-yl)indoline-1-carboxylate (4j)**

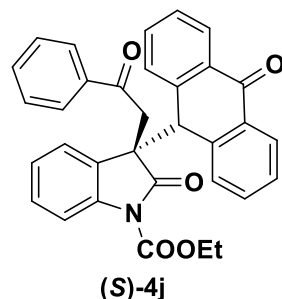

White solid, melting point 205-207 °C, yield 36%;  $[\alpha]_D^{25} = 5.93$  ( $\lambda$  589.3nm,  $c$  0.1, CH<sub>3</sub>OH).

**<sup>1</sup>H NMR (500 MHz, CDCl<sub>3</sub>):**  $\delta$  8.18 (d,  $J = 7.7$  Hz, 1H), 7.76 (dd,  $J = 10.3, 5.9$  Hz, 4H), 7.63 – 7.59 (m, 1H), 7.54 (dd,  $J = 7.3, 4.8$  Hz, 2H), 7.46 (d,  $J = 8.2$  Hz, 1H), 7.40 (dd,  $J = 12.9, 7.3$  Hz, 3H), 7.30 (t,  $J = 7.5$  Hz, 1H), 7.16 (t,  $J = 7.8$  Hz, 1H), 6.80 (t,  $J = 7.5$  Hz, 1H), 5.93 (d,  $J = 7.4$  Hz, 1H), 4.70 (s, 1H), 4.47 – 4.32 (m, 2H), 4.10 (d,  $J = 17.9$  Hz, 1H), 3.72 (d,  $J = 17.8$  Hz, 1H), 1.43 (t,  $J = 7.1$  Hz, 3H).

**<sup>13</sup>C NMR (125 MHz, CDCl<sub>3</sub>):**  $\delta$  194.8, 183.6, 177.8, 150.1, 140.3, 138.6, 137.6, 136.0, 135.7, 133.8, 133.7, 131.6, 131.3, 129.7, 129.4, 128.9, 128.8, 128.8, 128.2, 128.1, 127.5, 126.5, 125.8, 124.1, 123.8, 114.8, 63.1, 55.9, 52.1, 46.1, 14.5.

**HRMS (ESI):** Calcd. for C<sub>33</sub>H<sub>25</sub>NO<sub>5</sub>Na, [M+Na]: 538.1630; Found: 538.1633.

**(S)-1-acetyl-3-(2-oxo-2-phenylethyl)-3-(10-oxo-9,10-dihydroanthracen-9-yl)indolin-2-one (4k)**

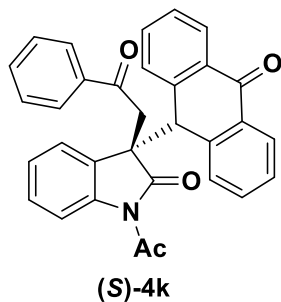

White solid, melting point 228-230 °C, yield 38%;  $[\alpha]_D^{25} = 7.60$  ( $\lambda$  589.3nm,  $c$  0.163, CH<sub>3</sub>OH).

**<sup>1</sup>H NMR (500 MHz, CDCl<sub>3</sub>):**  $\delta$  8.17 (d,  $J$  = 7.6 Hz, 1H), 7.82 (dd,  $J$  = 16.2, 7.9 Hz, 2H), 7.76 (d,  $J$  = 7.7 Hz, 2H), 7.68 (t,  $J$  = 7.4 Hz, 1H), 7.63 – 7.58 (m, 2H), 7.56 (dd,  $J$  = 13.9, 6.5 Hz, 1H), 7.50 (d,  $J$  = 7.5 Hz, 1H), 7.43 (m, 3H), 7.34 (t,  $J$  = 7.5 Hz, 1H), 7.19 (t,  $J$  = 7.8 Hz, 1H), 6.86 (t,  $J$  = 7.5 Hz, 1H), 6.03 (d,  $J$  = 7.4 Hz, 1H), 4.67 (s, 1H), 4.02 (d,  $J$  = 17.8 Hz, 1H), 3.80 (d,  $J$  = 17.8 Hz, 1H), 2.58 (s, 3H).

**<sup>13</sup>C NMR (125 MHz, CDCl<sub>3</sub>)**  $\delta$  195.0, 183.6, 180.1, 167.0, 141.0, 138.4, 137.6, 135.9, 135.6, 133.9, 131.6, 131.2, 129.5, 129.4, 128.9, 128.6, 128.1, 127.4, 126.8, 126.1, 124.5, 123.6, 116.2, 55.9, 52.3, 46.1, 26.7.

**HRMS (ESI):** Calcd. for C<sub>32</sub>H<sub>22</sub>NO<sub>4</sub>Na, [M+Na]: 508.1525; Found: 508.1526.



#### 4. $^1\text{H}$ and $^{13}\text{C}$ NMR Spectra

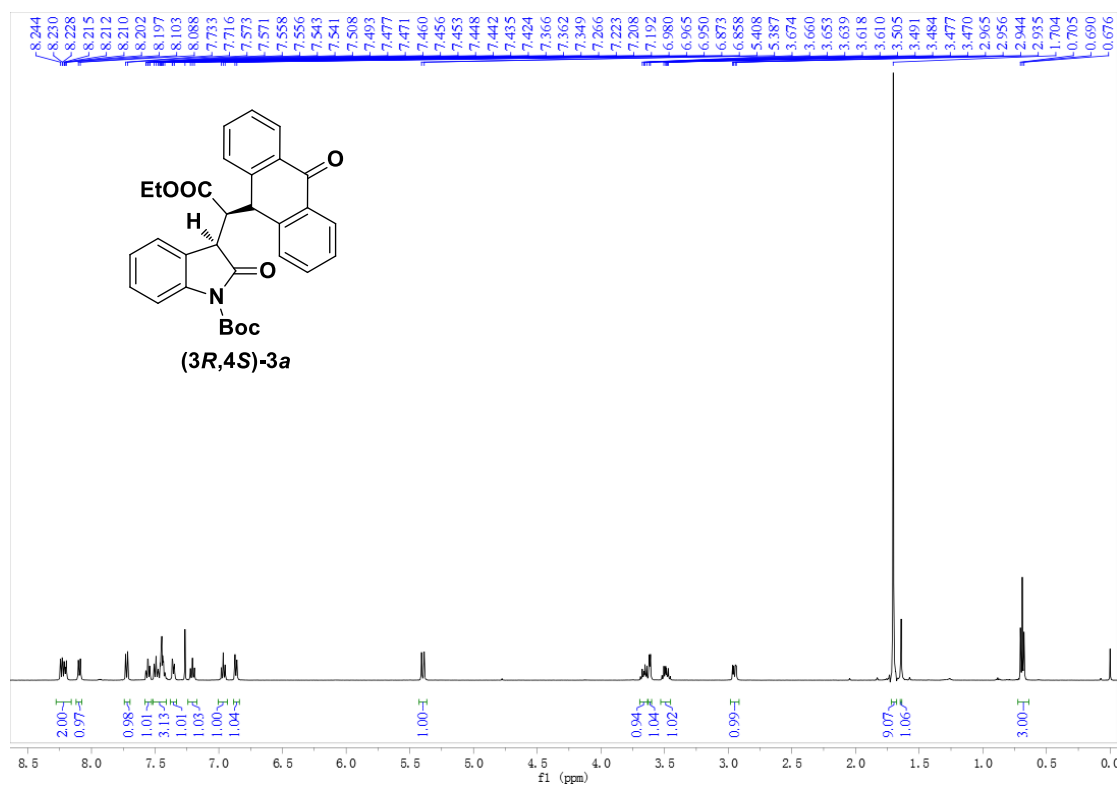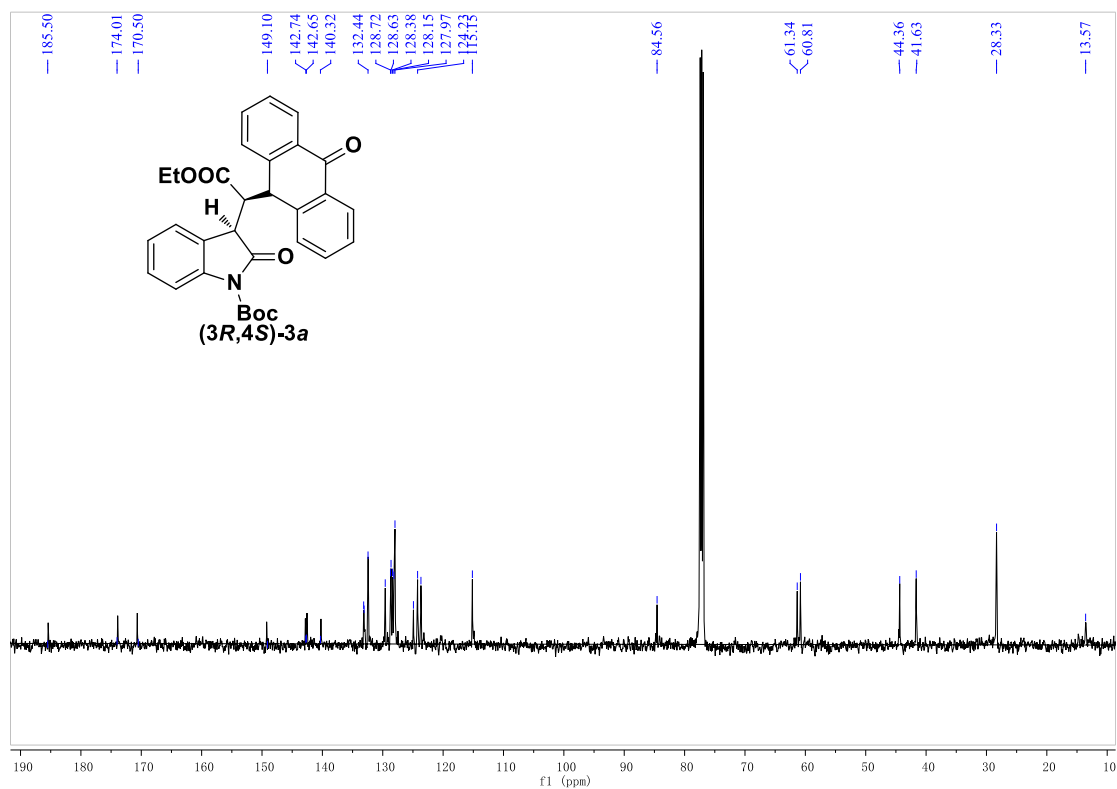

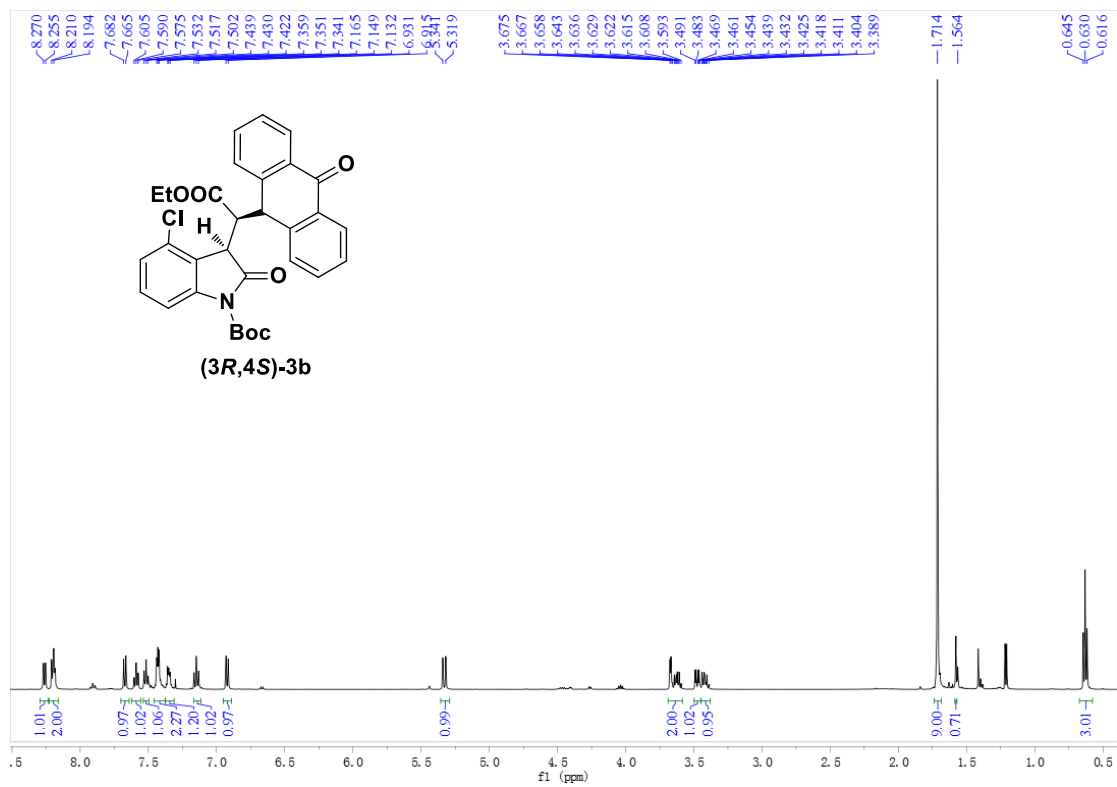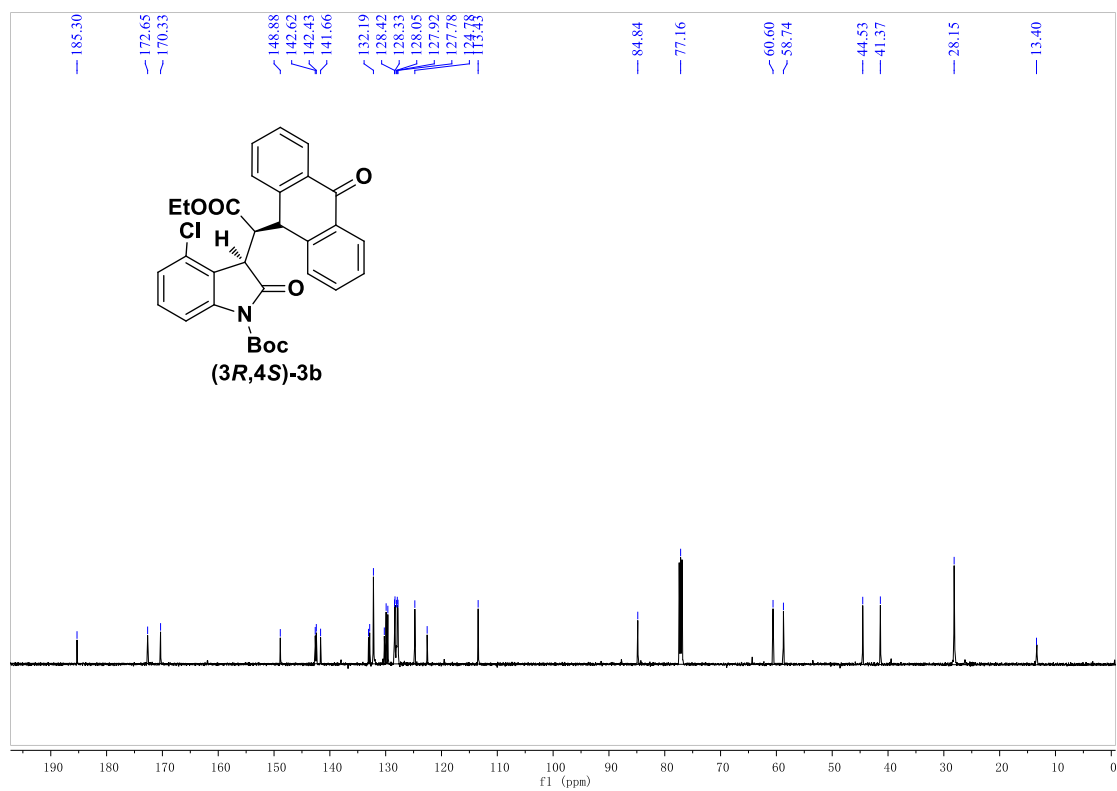

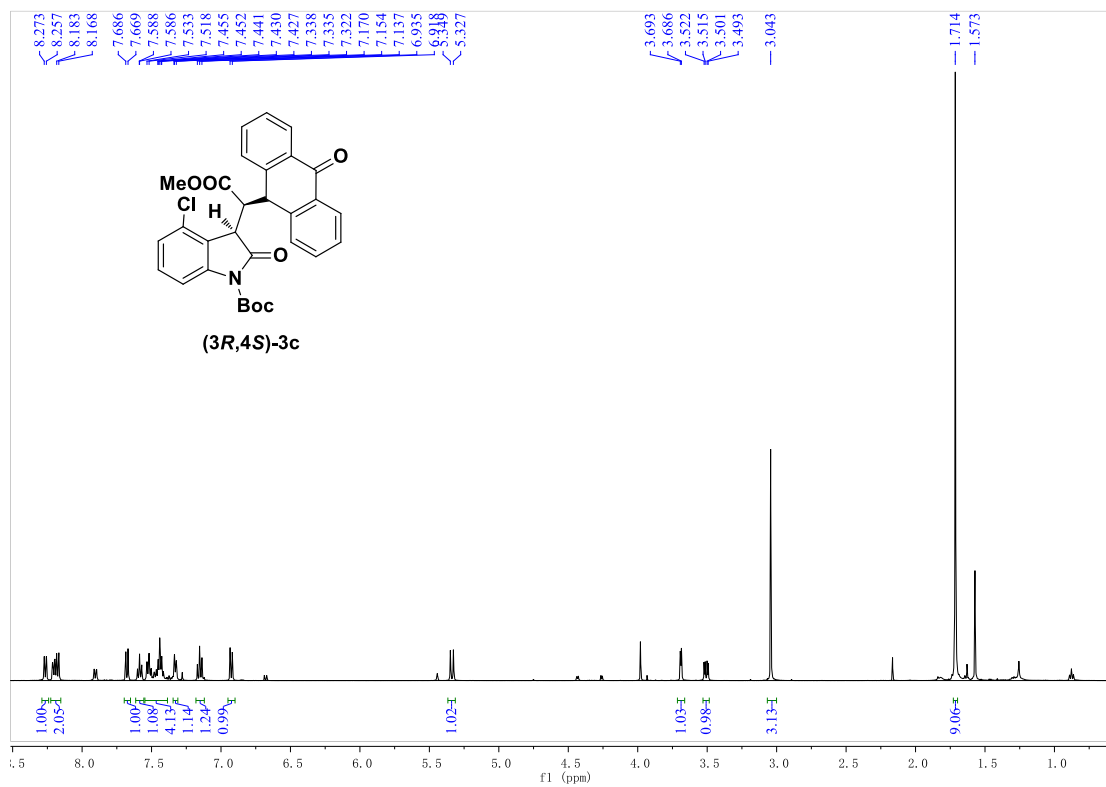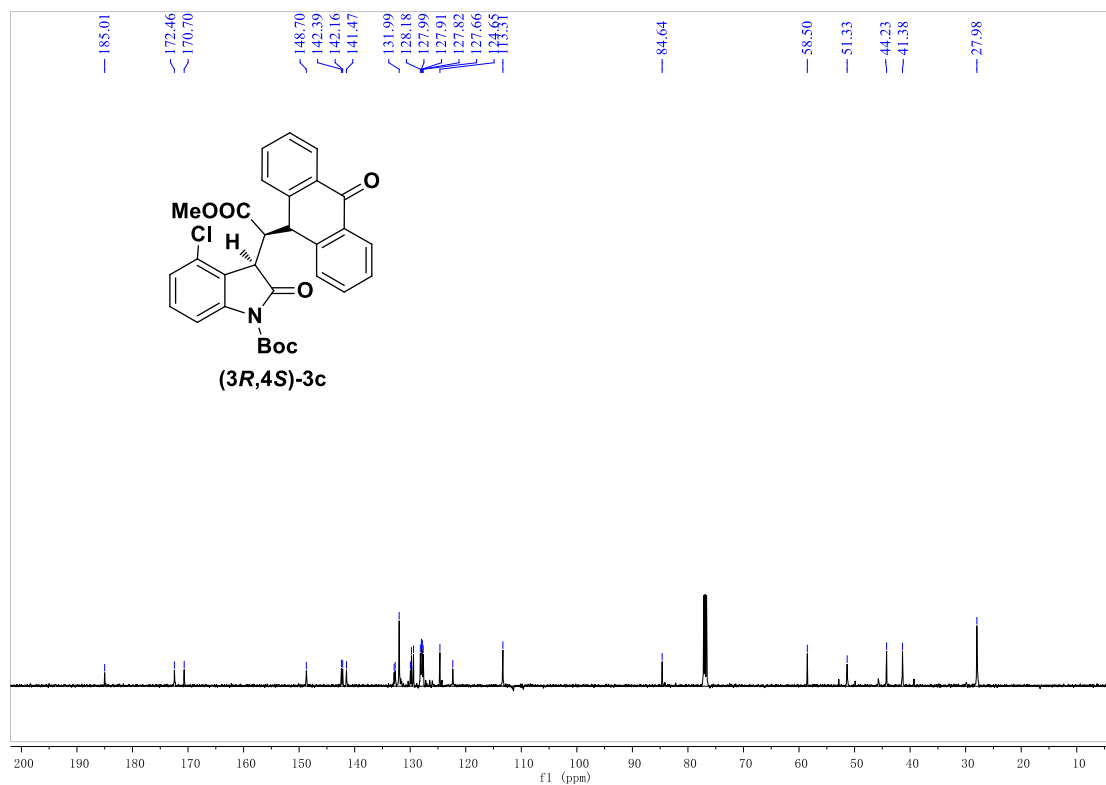

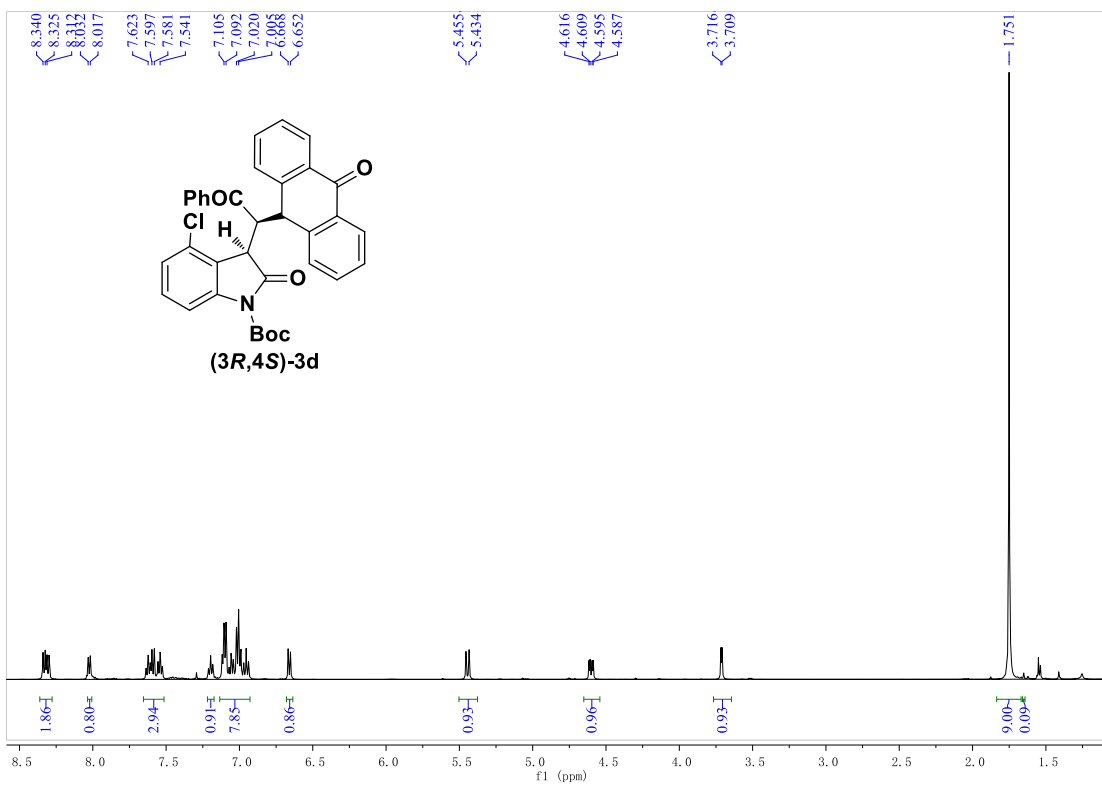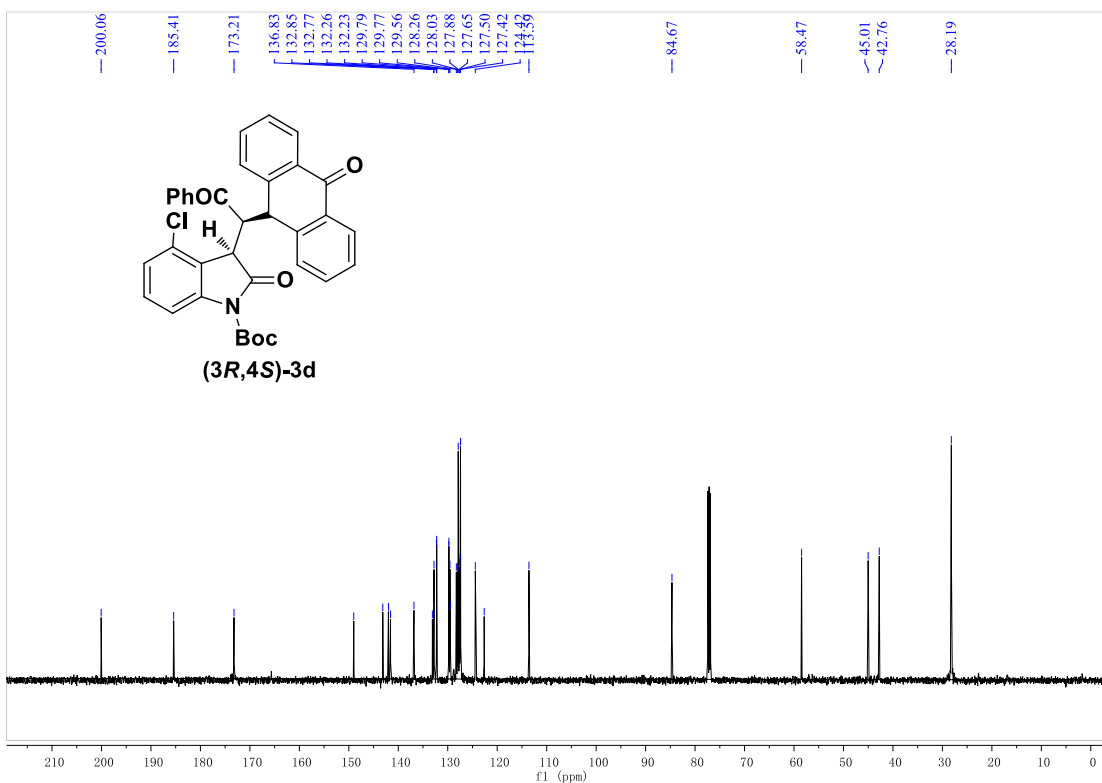

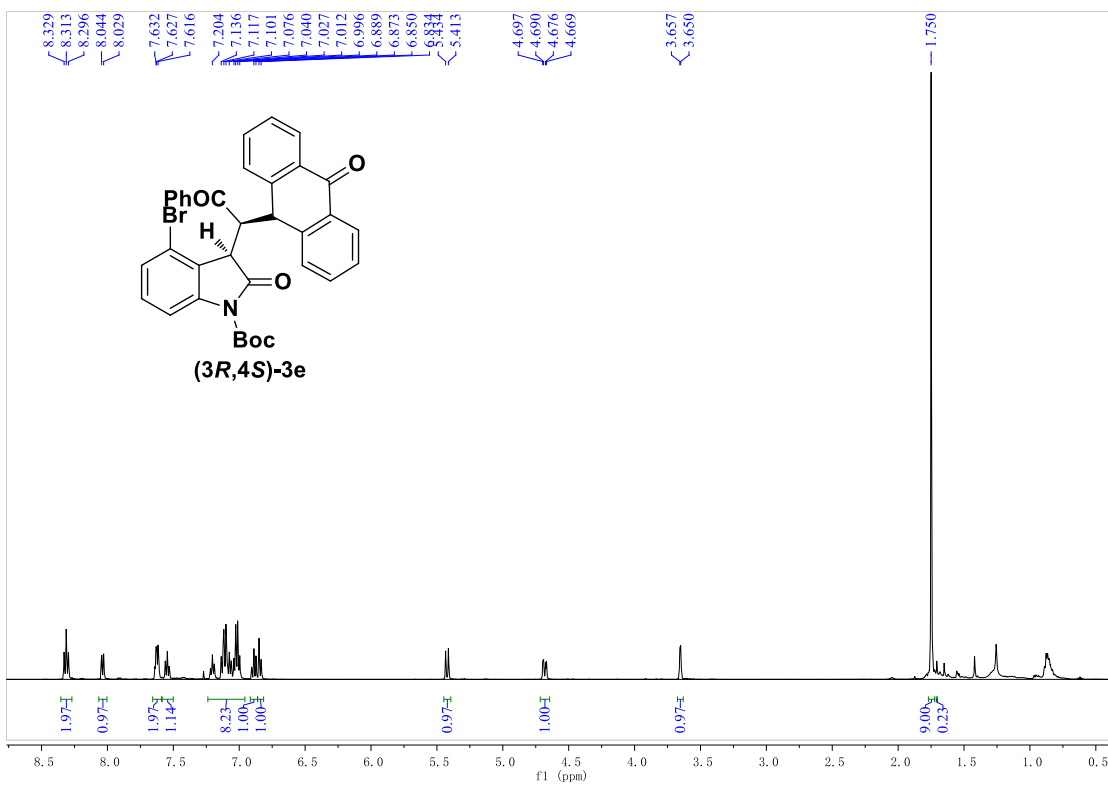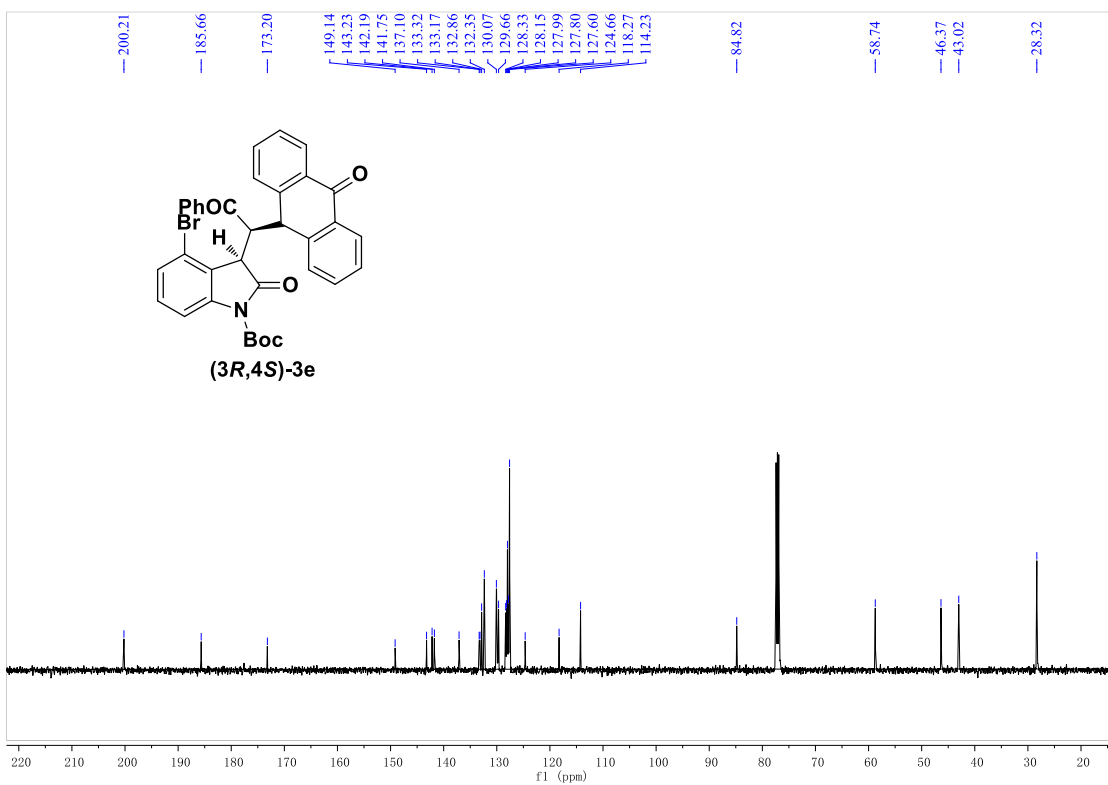

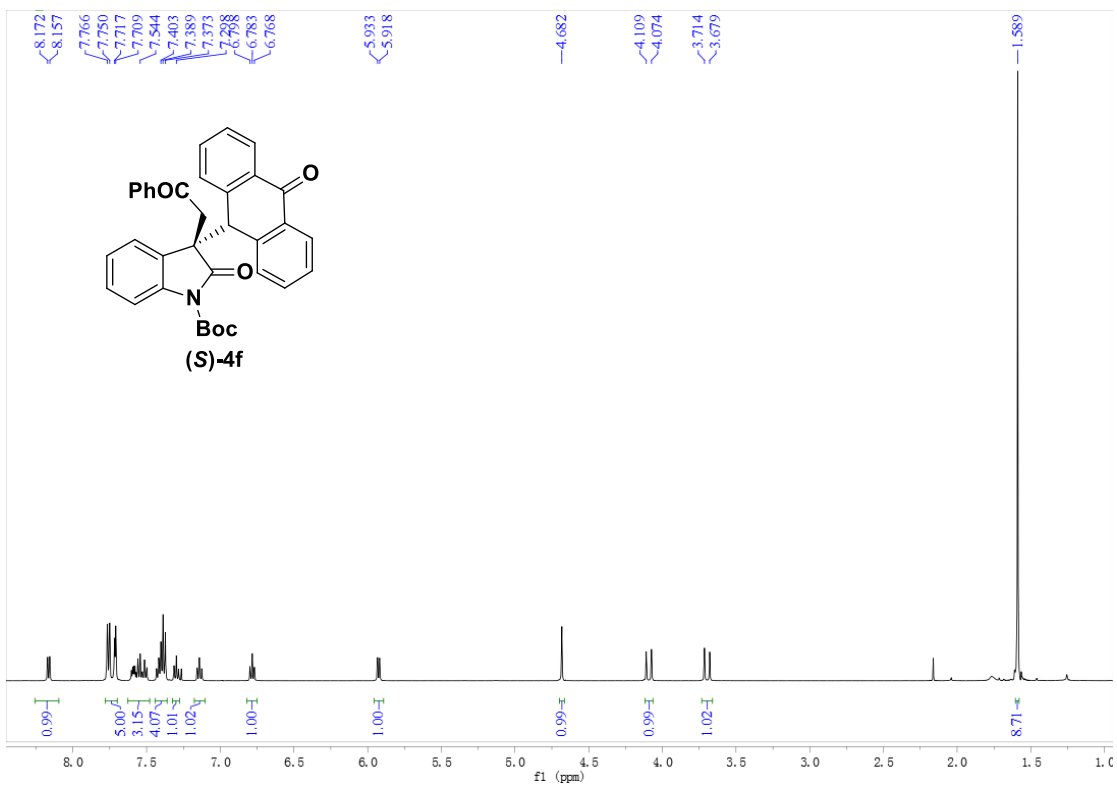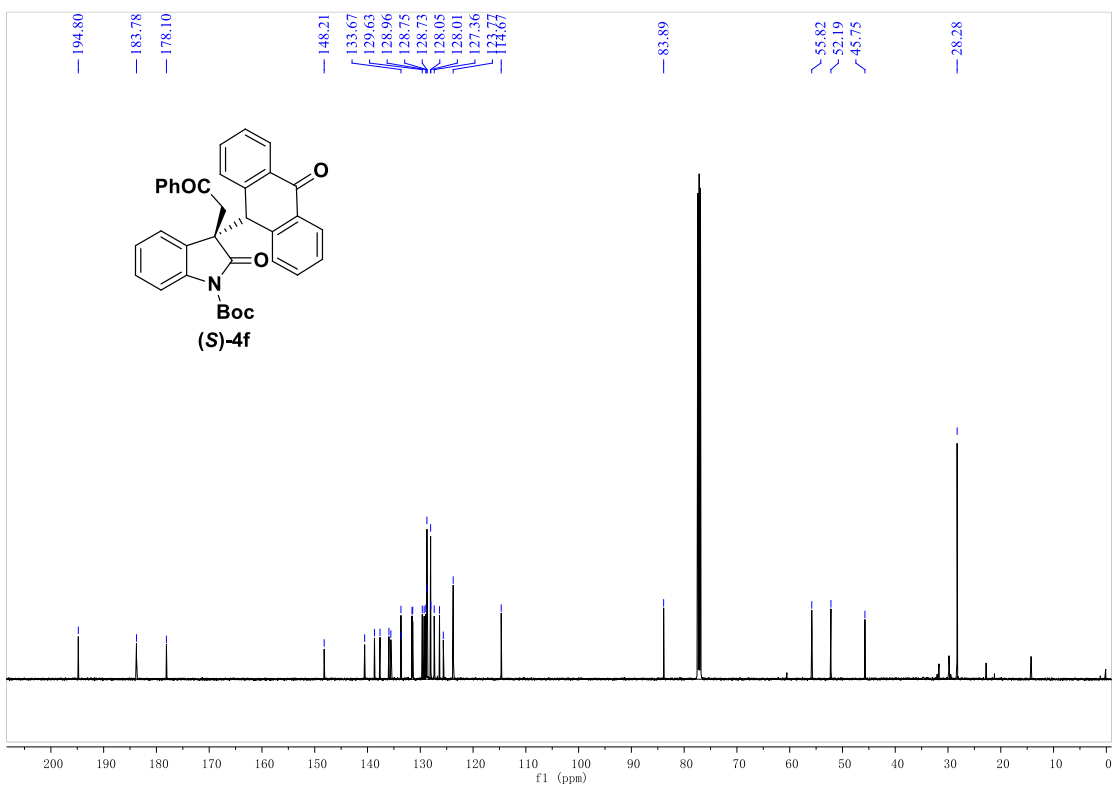

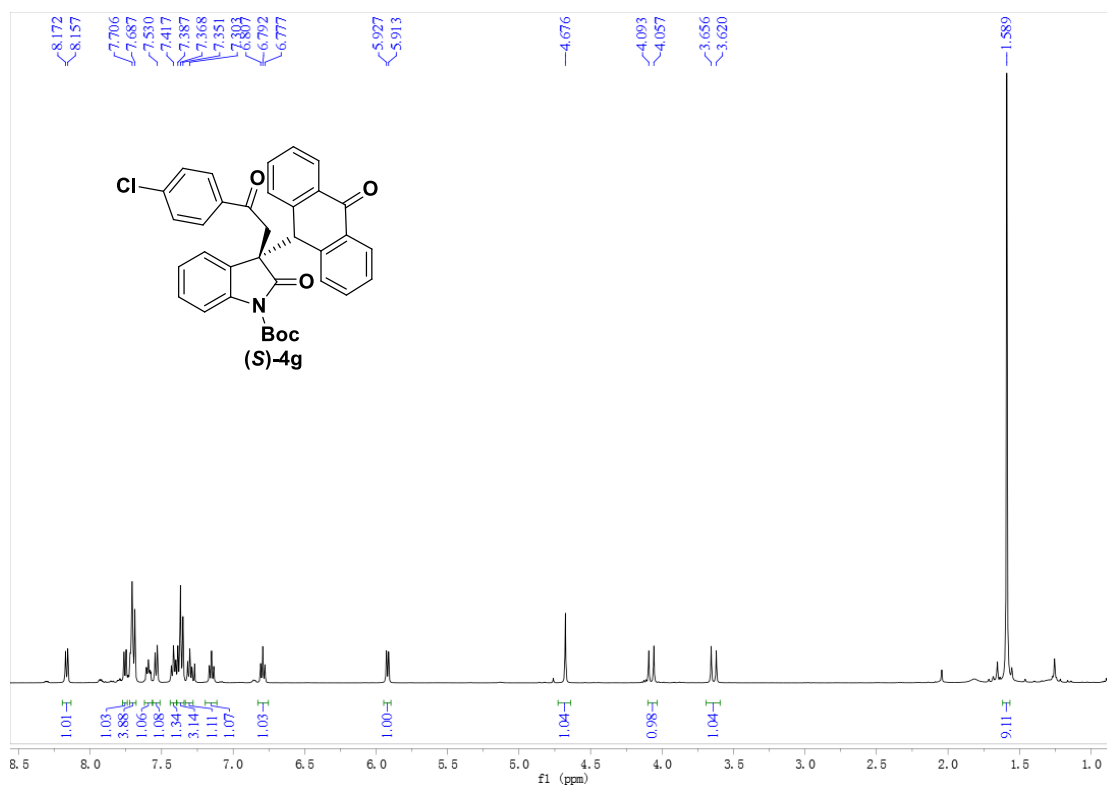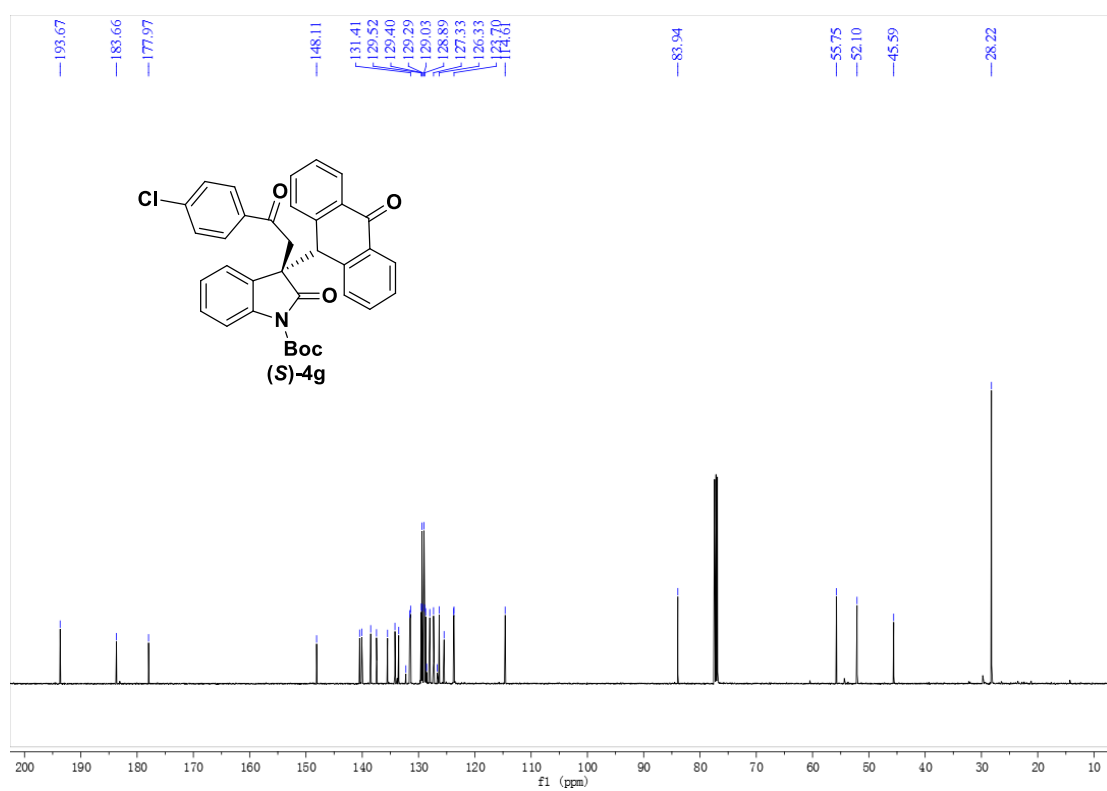

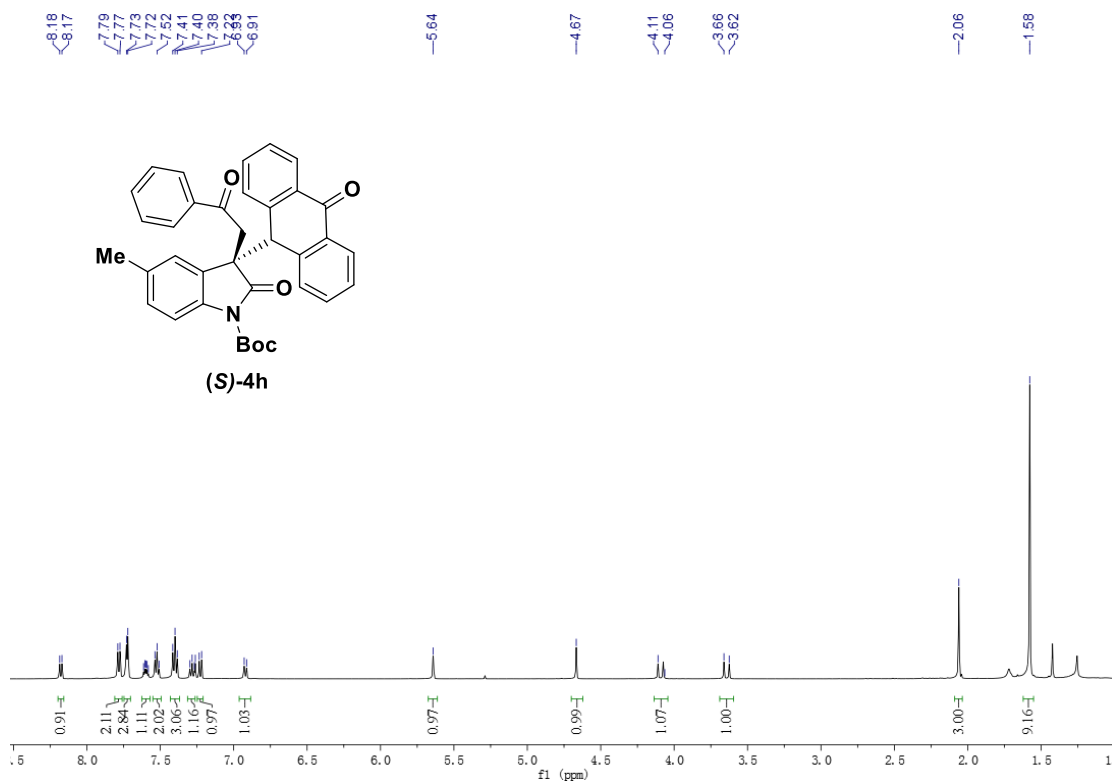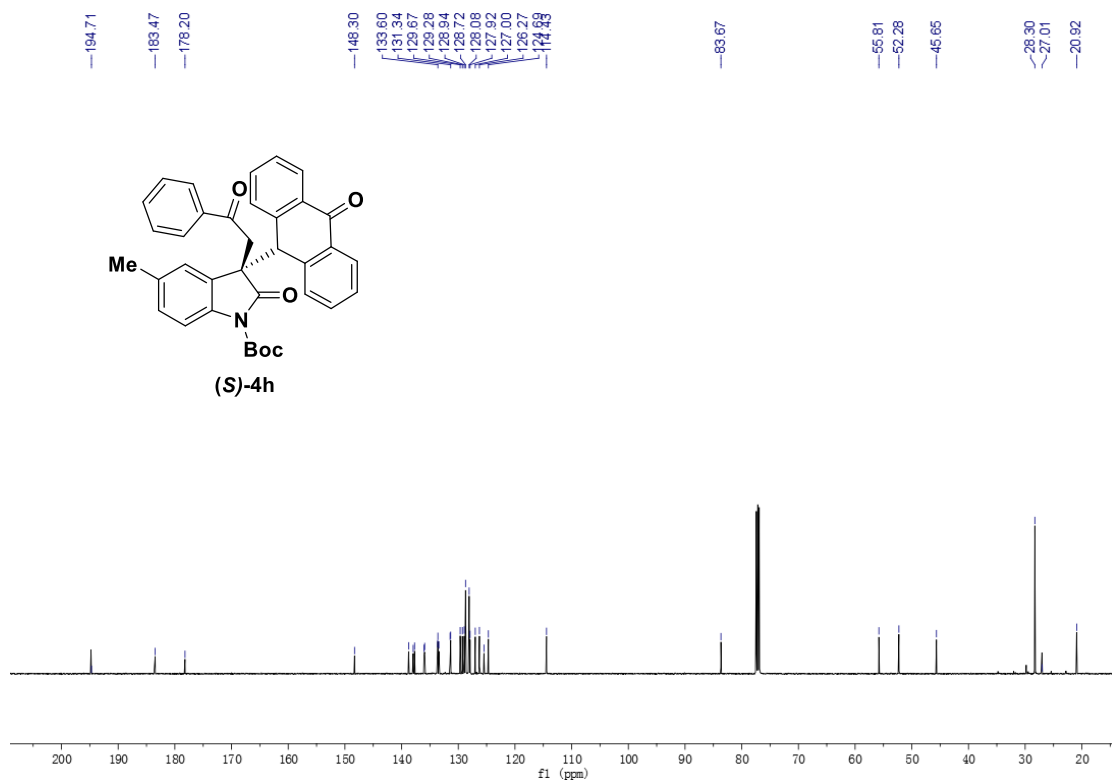



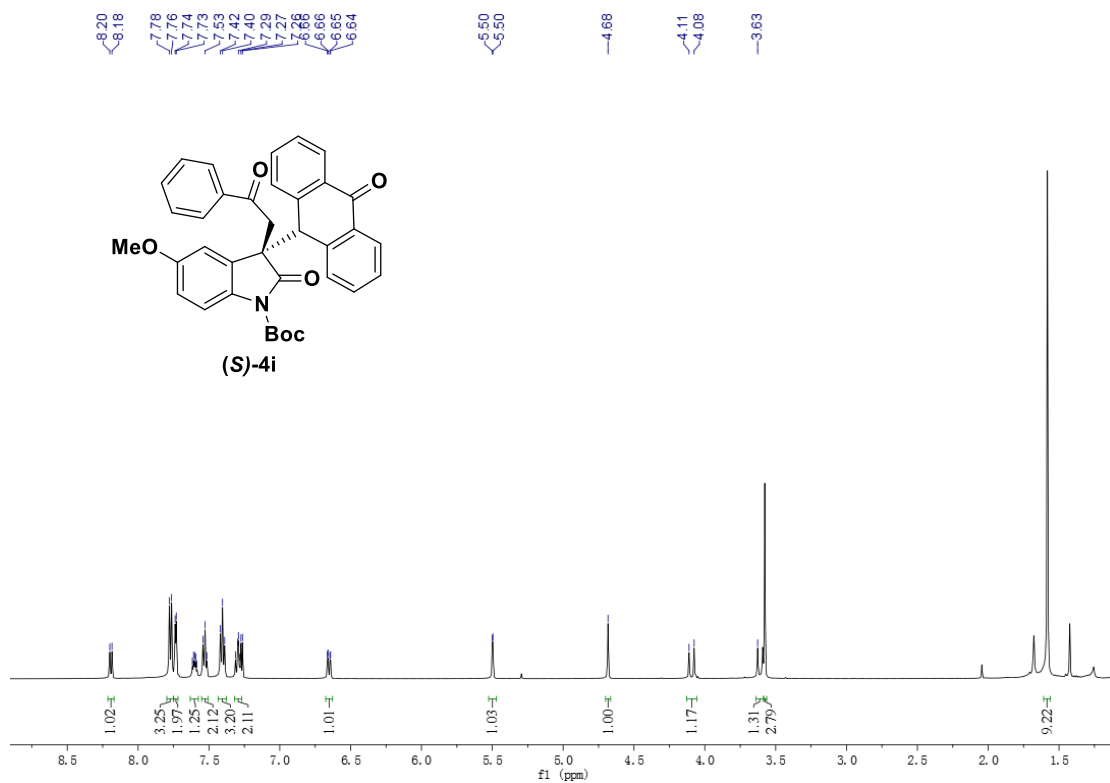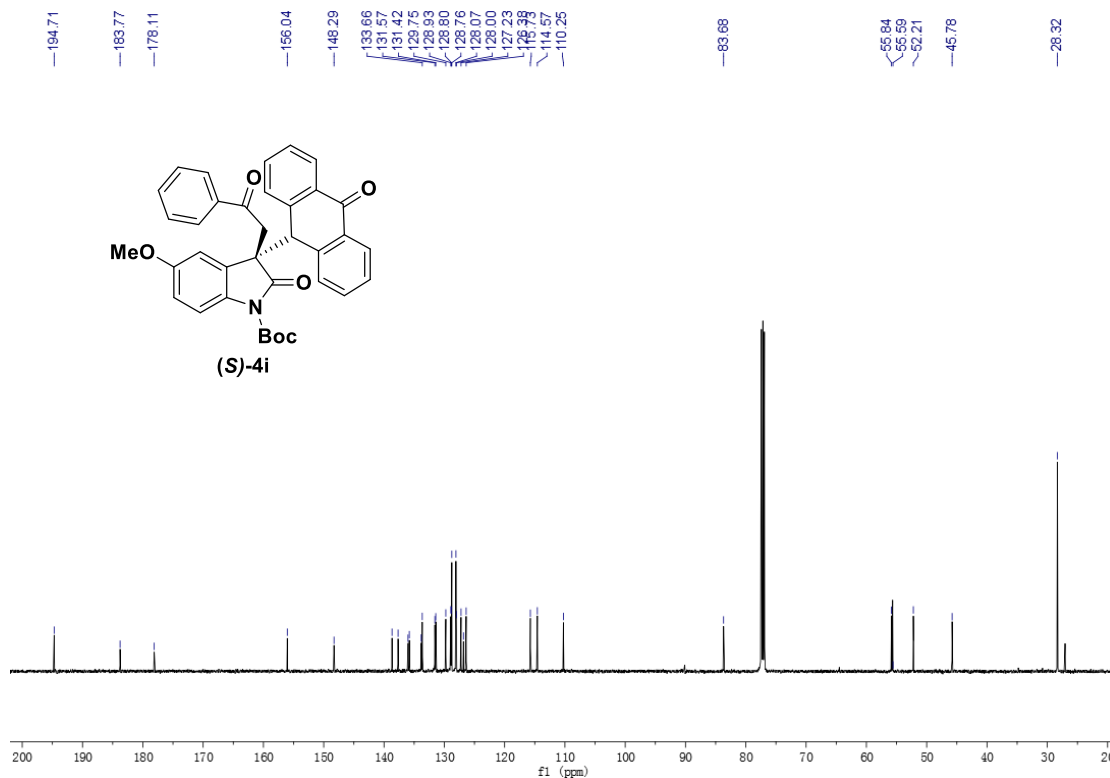

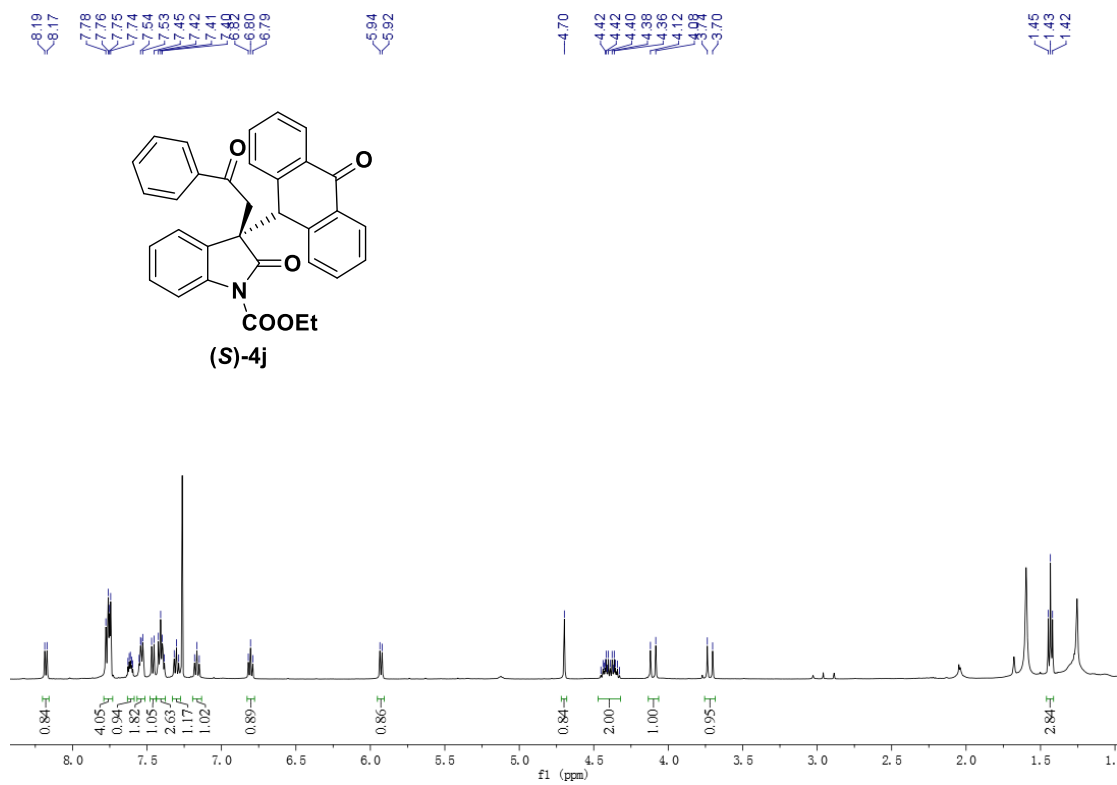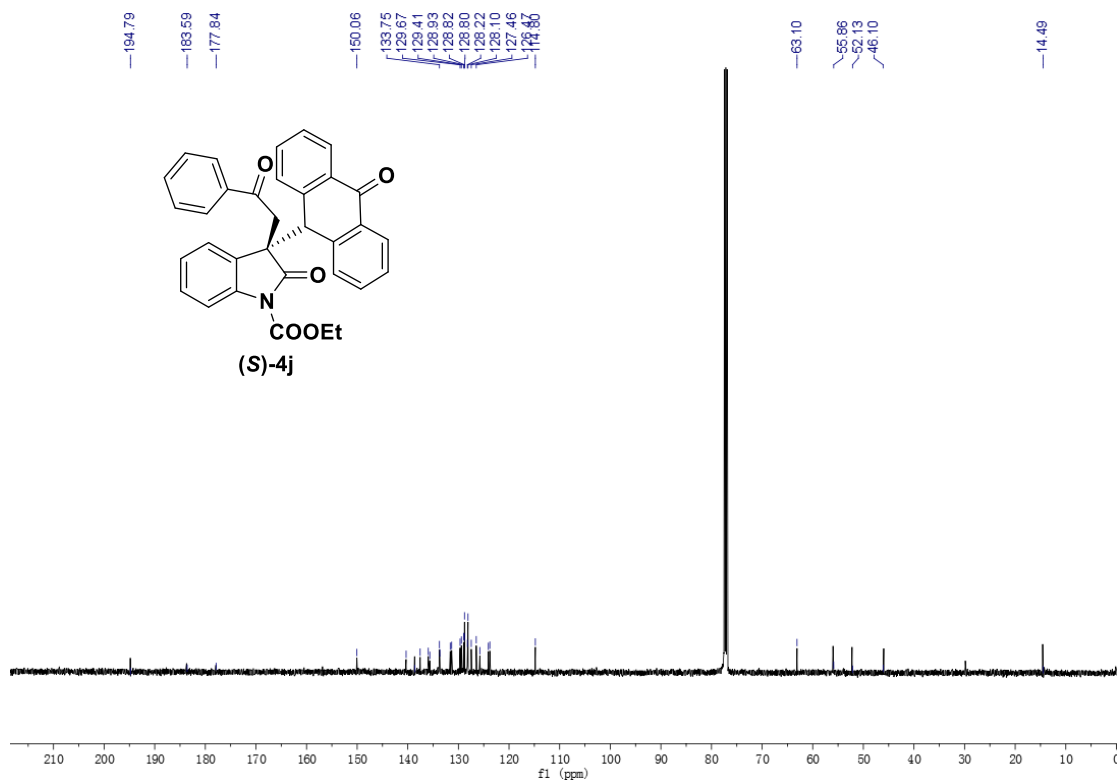

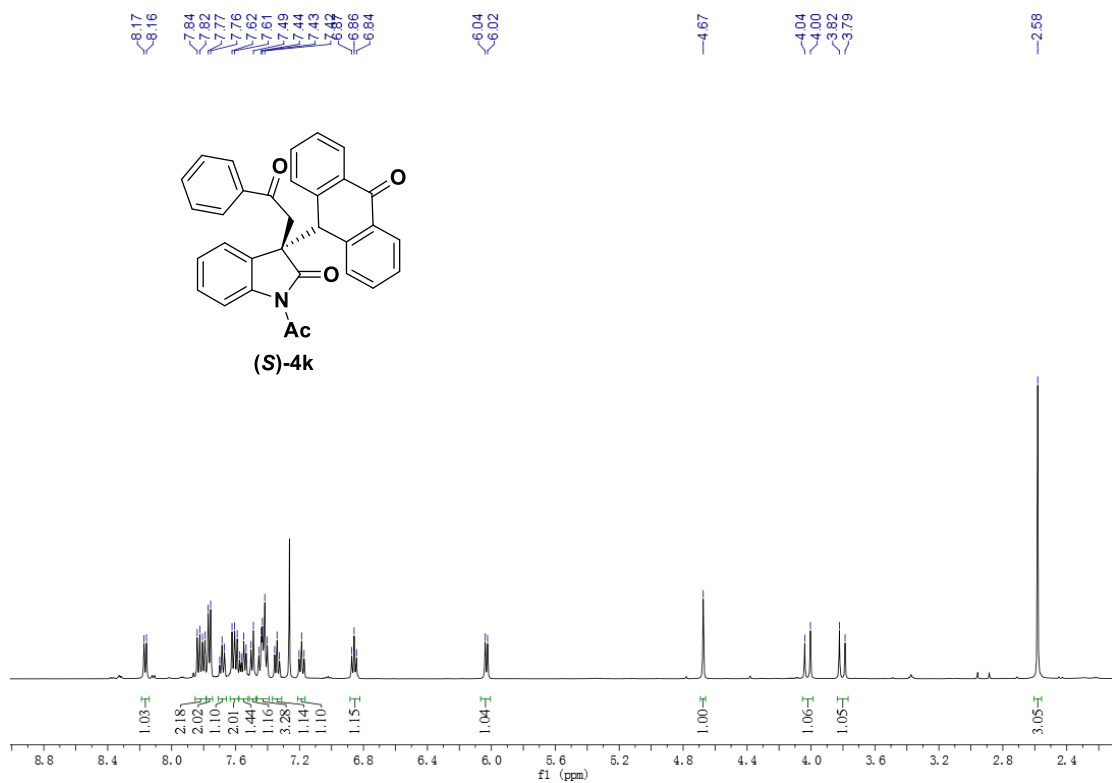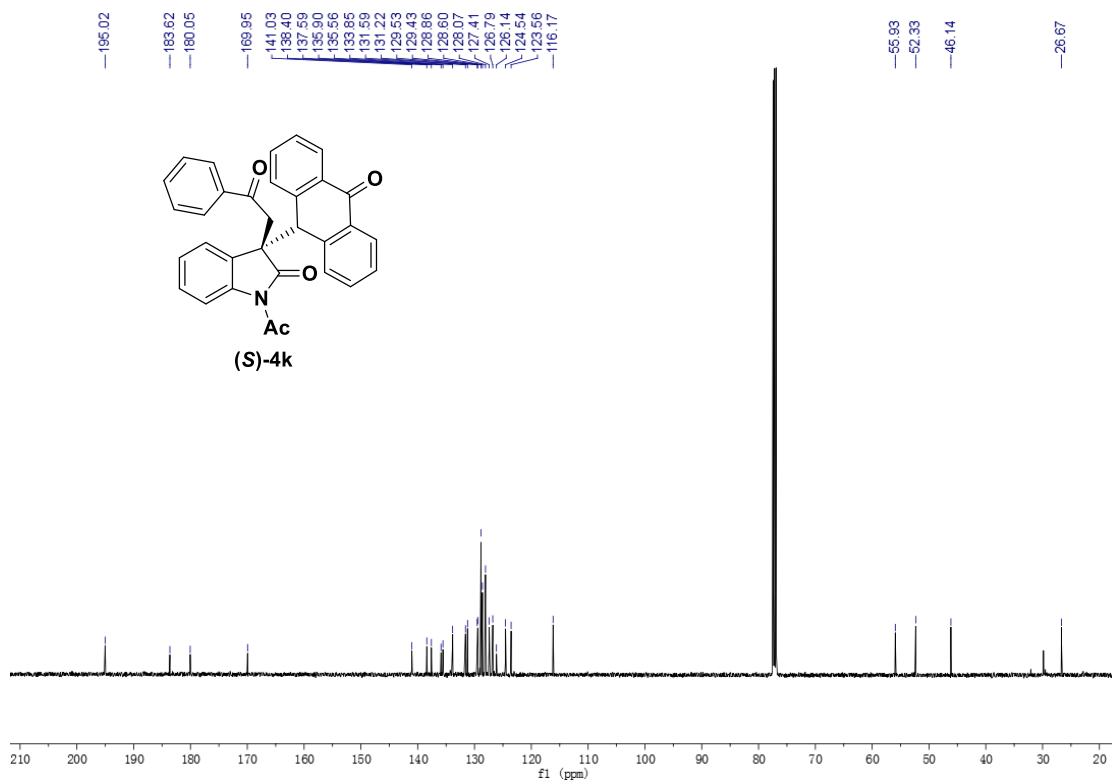

## 5. HPLC Spectra

(*R*)-tert-butyl 3-((*S*)-2-ethoxy-2-oxo-1-(10-oxo-9,10-dihydroanthracen-9-yl)ethyl)-2-oxoindoline-1-carboxylate ((**3R,4S**)-**3a**)

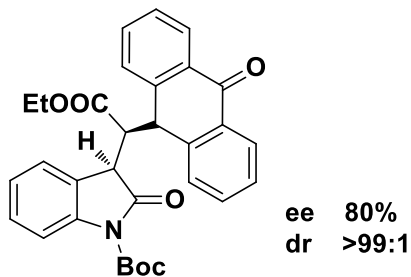

The ee determined by chiral HPLC; CHIRALPAK AD-H (4.6 mm  $\phi$   $\times$  250 mmL); hexane/2-propanol 95/5; flow rate 1.0 ml/min; temp 25  $^{\circ}$ C; detection UV 210 nm.

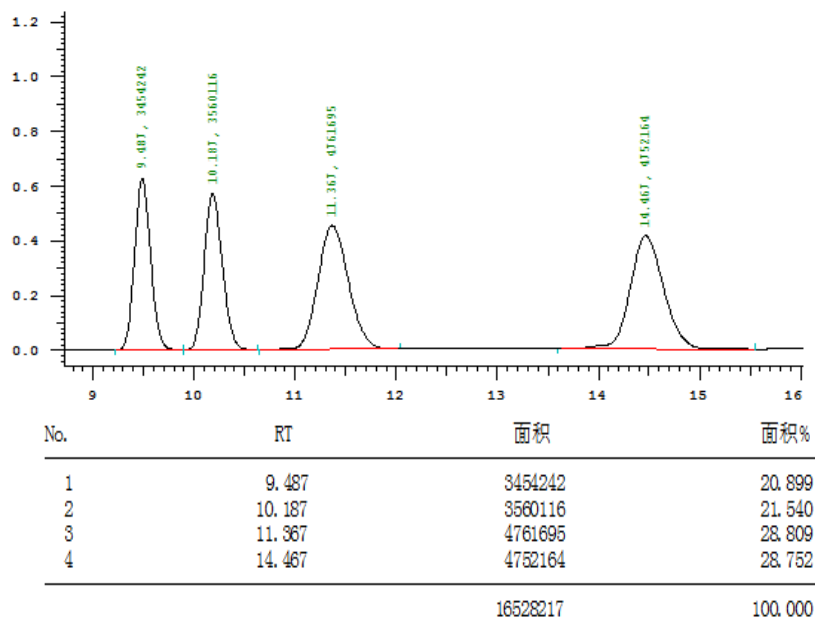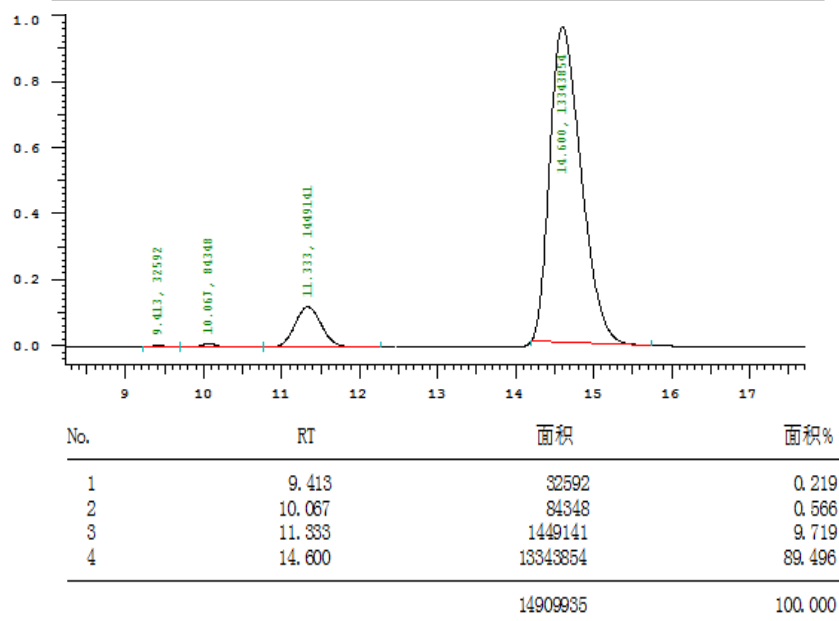

(*R*)-tert-butyl 4-chloro-3-((*S*)-2-ethoxy-2-oxo-1-(10-oxo-9,10-dihydroanthracen-9-yl)ethyl)-2-oxindoline-1-carboxylate (**(3*R*,4*S*)-3b**)

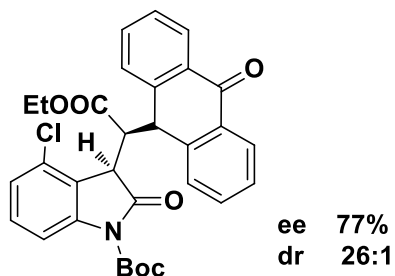

The ee determined by chiral HPLC; CHIRALPAK AD-H (4.6 mm  $\phi$   $\times$  250 mmL); hexane/2-propanol 95/5; flow rate 1.0 ml/min; temp 25  $^{\circ}$ C; detection UV 245 nm.

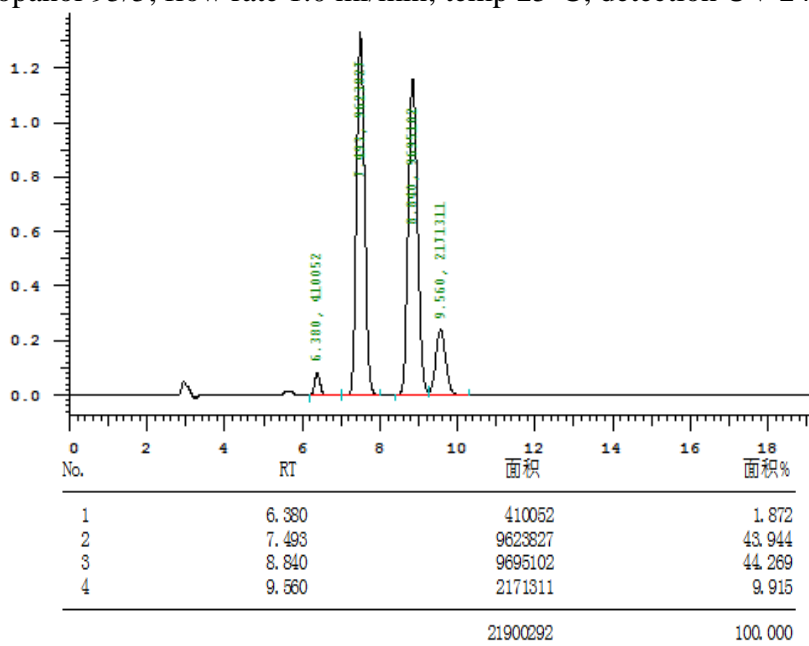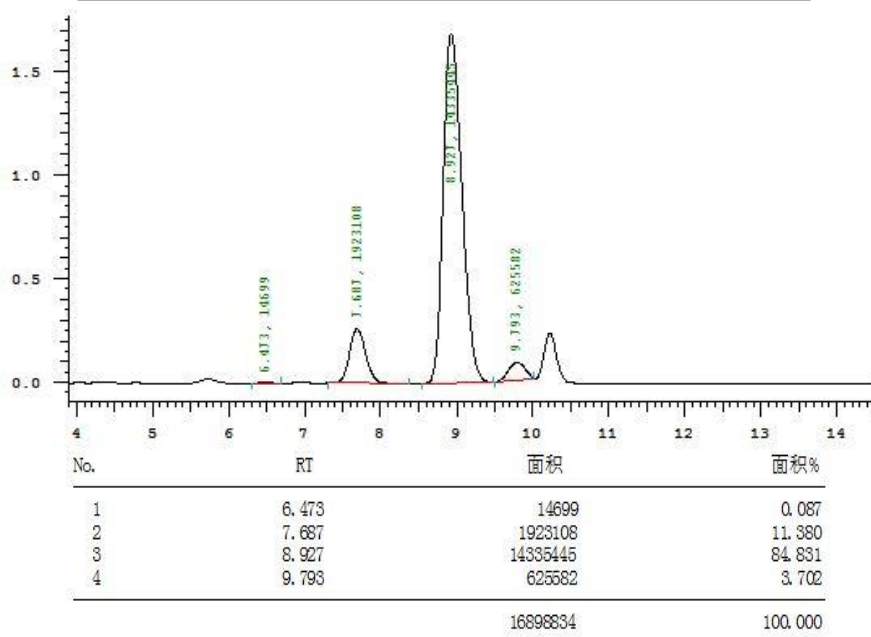

(*R*)-tert-butyl 4-chloro-3-((*S*)-2-methoxy-2-oxo-1-(10-oxo-9,10-dihydroanthracen-9-yl)ethyl)-2-oxindoline-1-carboxylate (**(3*R*,4*S*)-3c**)

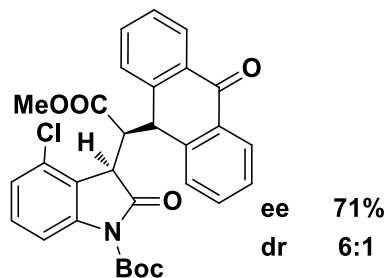

The ee determined by chiral HPLC; CHIRALPAK AD-H (4.6 mm  $\phi$ ×250 mmL); hexane/2-propanol 95/5; flow rate 1.0 ml/min; temp 25 °C; detection UV 241 nm.

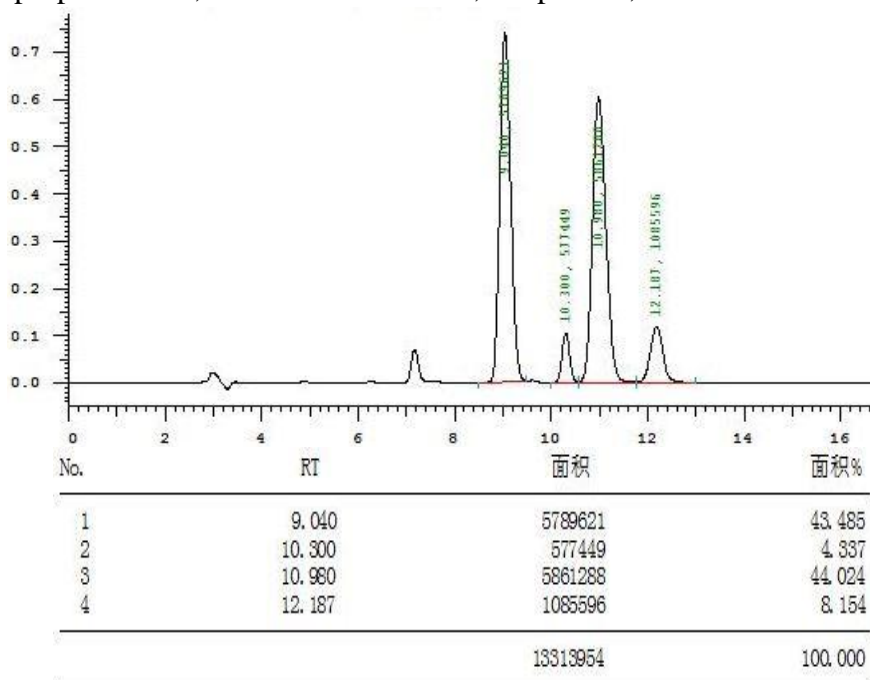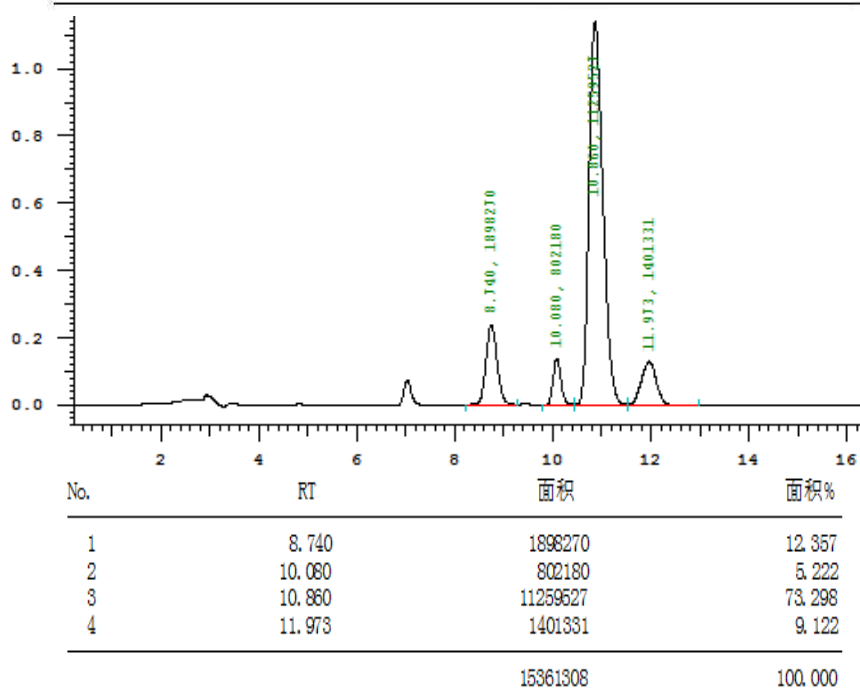

(*R*)-tert-butyl 4-chloro-2-oxo-3-((*S*)-2-oxo-1-(10-oxo-9,10-dihydroanthracen-9-yl)-2-phenylethyl)indoline-1-carboxylate ((*3R,4S*)-**3d**)

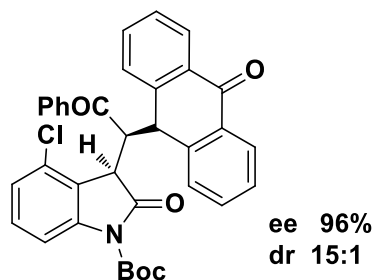

The ee determined by chiral HPLC; CHIRALPAK AD-H (4.6 mm  $\phi$   $\times$  250 mmL); hexane/2-propanol 95/5; flow rate 1.0 ml/min; temp 25  $^{\circ}$ C; detection UV 224 nm.

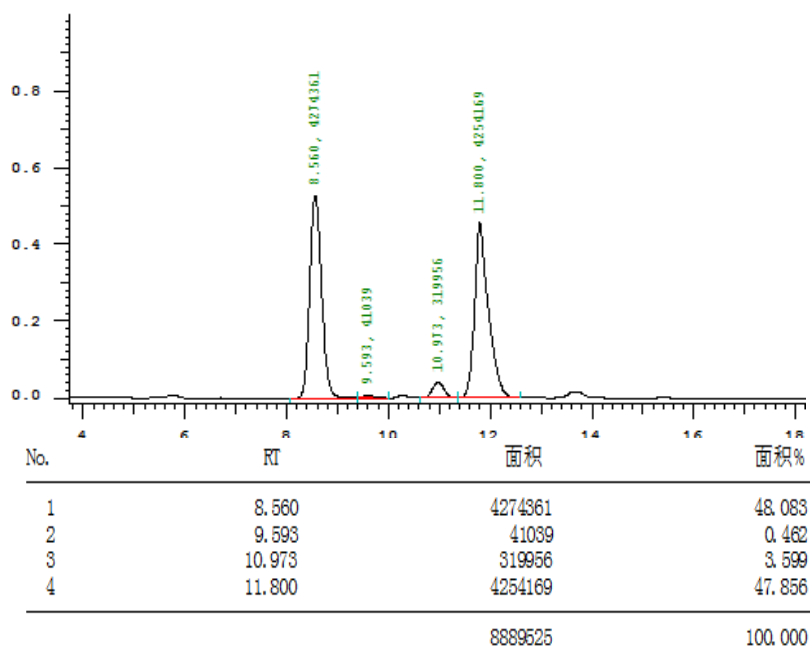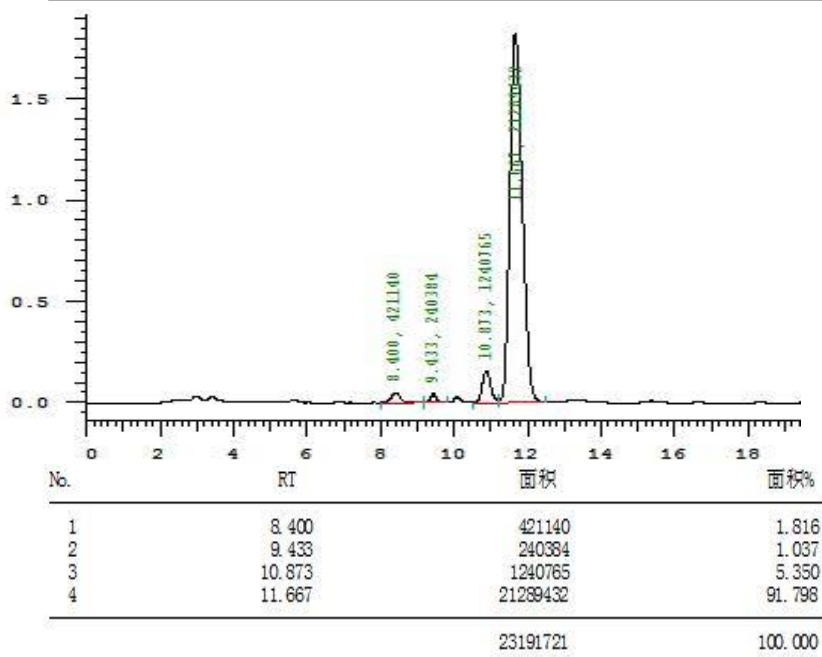

(*R*)-tert-butyl 4-bromo-2-oxo-3-((*S*)-2-oxo-1-(10-oxo-9,10-dihydroanthracen-9-yl)-2-phenylethyl)indoline-1-carboxylate ((*3R,4S*)-**3e**)

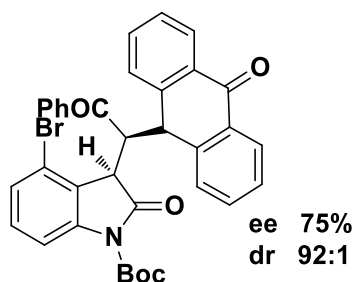

The ee determined by chiral HPLC; CHIRALPAK AD-H (4.6 mm  $\phi$   $\times$  250 mmL); hexane/2-propanol 95/5; flow rate 1.0 ml/min; temp 25  $^{\circ}$ C; detection UV 260 nm.

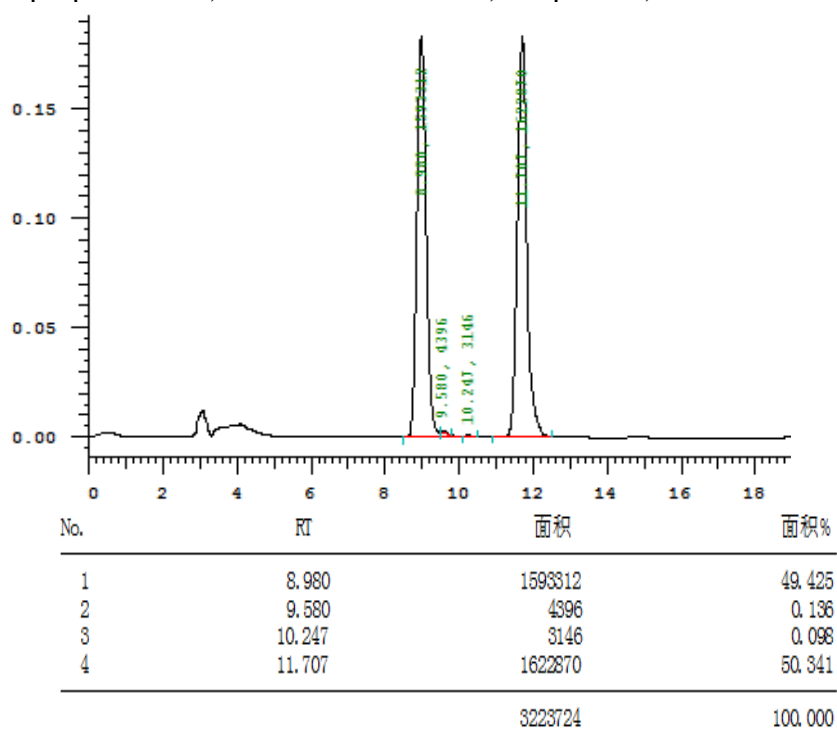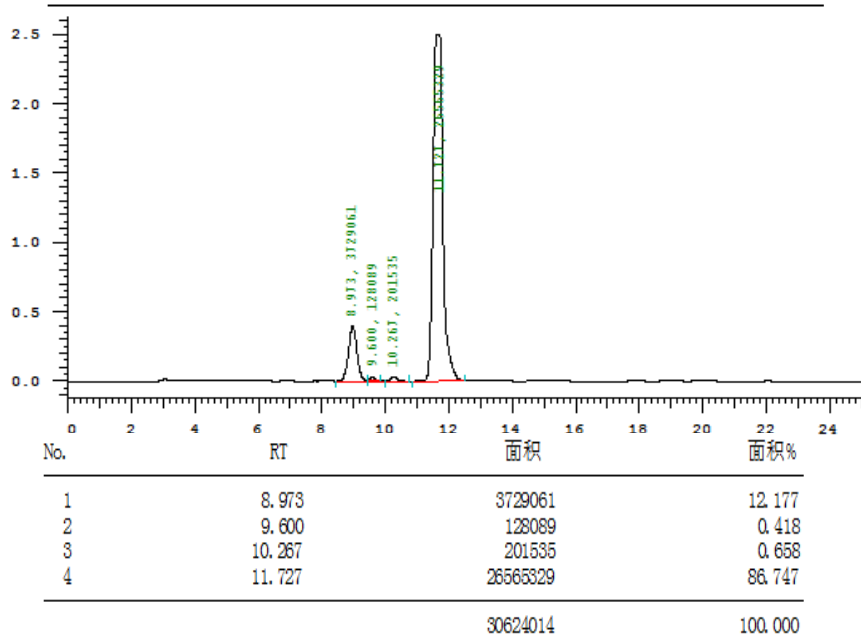



(*S*)-tert-butyl 2-oxo-3-(2-oxo-2-phenylethyl)-3-(10-oxo-9,10-dihydroanthracen-9-yl)indoline-1-carboxylate ((*S*)-**4f**)

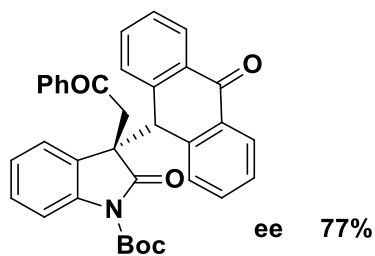

The ee determined by chiral HPLC; CHIRALPAK AD-H (4.6 mm  $\phi$ ×250 mmL); hexane/2-propanol 76/24; flow rate 0.8 ml/min; temp 25 °C; detection UV 260 nm.

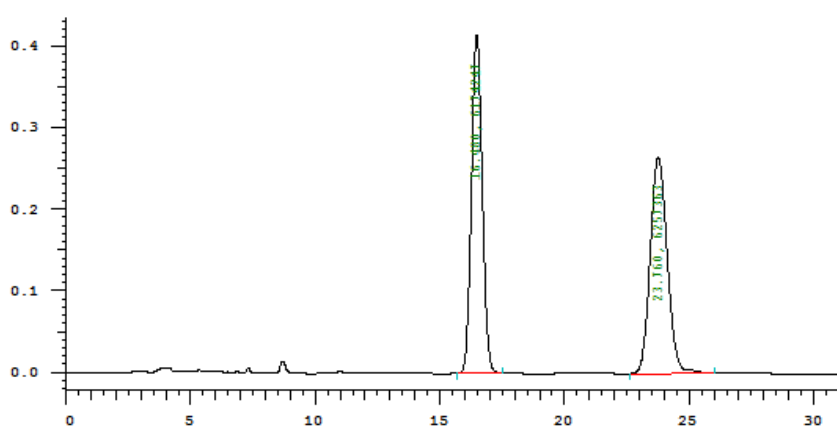

| No. | RT     | 面积       | 面积%     |
|-----|--------|----------|---------|
| 1   | 16.480 | 6174247  | 49.666  |
| 2   | 23.760 | 6257363  | 50.334  |
|     |        | 12431610 | 100.000 |

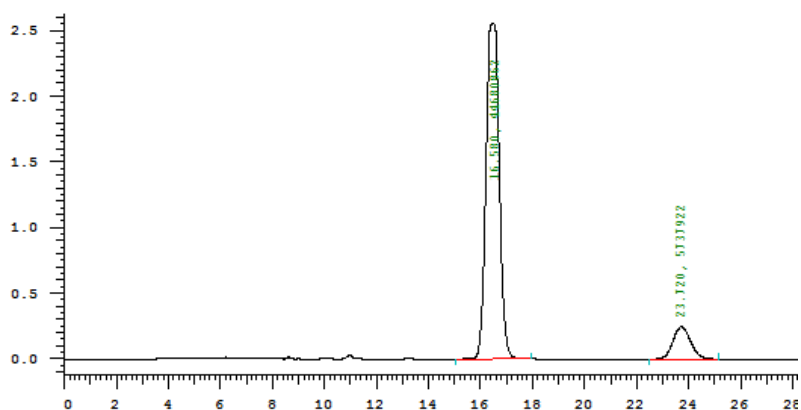

| No. | RT     | 面积       | 面积%     |
|-----|--------|----------|---------|
| 1   | 16.580 | 44680862 | 88.619  |
| 2   | 23.720 | 5737922  | 11.381  |
|     |        | 50418784 | 100.000 |

(*S*)-tert-butyl 3-(2-(4-chlorophenyl)-2-oxoethyl)-2-oxo-3-(10-oxo-9,10-dihydroanthracen-9-yl)indoline-1-carboxylate ((*S*)-**4g**)

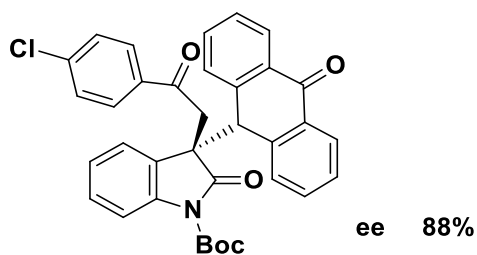

The ee determined by chiral HPLC; CHIRALPAK AD-H (4.6 mm  $\phi$   $\times$  250 mmL); hexane/2-propanol 76/24; flow rate 0.8 ml/min; temp 25  $^{\circ}$ C; detection UV 260 nm.

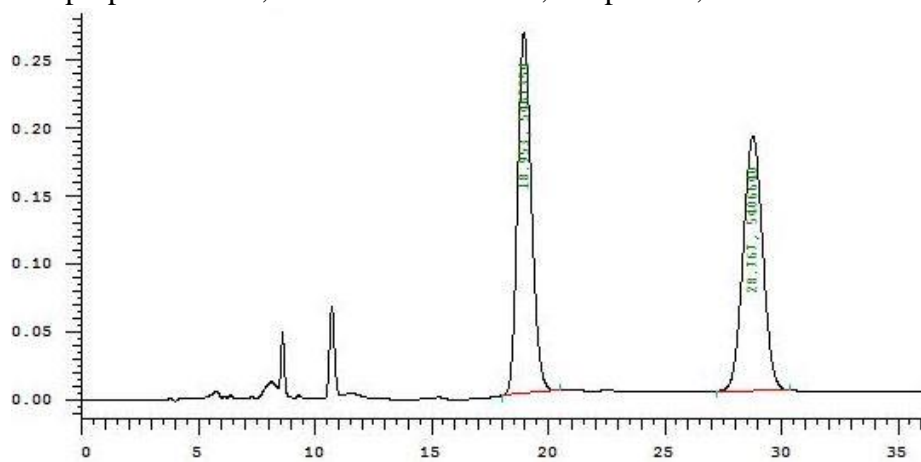

| No. | RT     | 面积       | 面积%     |
|-----|--------|----------|---------|
| 1   | 18.953 | 5467354  | 50.279  |
| 2   | 28.767 | 5406640  | 49.721  |
|     |        | 10873994 | 100.000 |

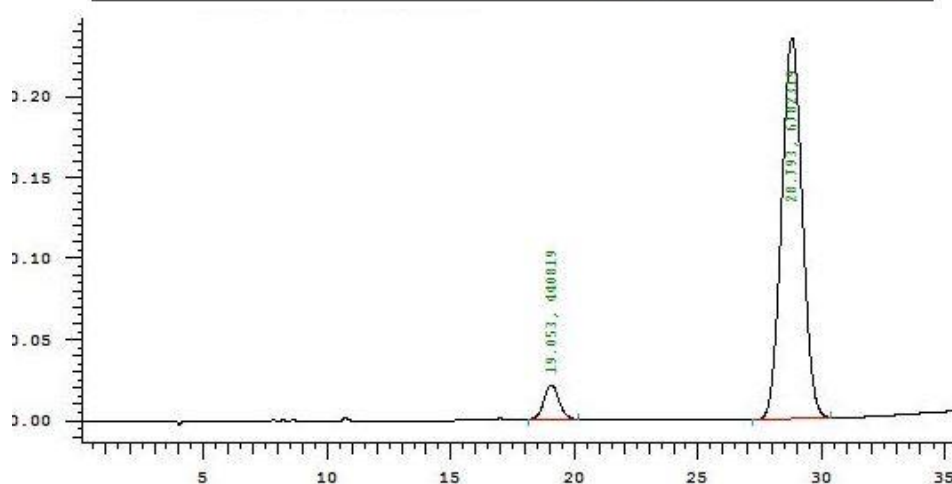

| No. | RT     | 面积      | 面积%     |
|-----|--------|---------|---------|
| 1   | 19.053 | 440819  | 6.103   |
| 2   | 28.793 | 6782319 | 93.897  |
|     |        | 7223138 | 100.000 |

**tert-butyl (S)-5-methyl-2-oxo-3-(2-oxo-2-phenylethyl)-3-(10-oxo-9,10-dihydroanthracen-9-yl)indoline-1-carboxylate ((S)-4h)**

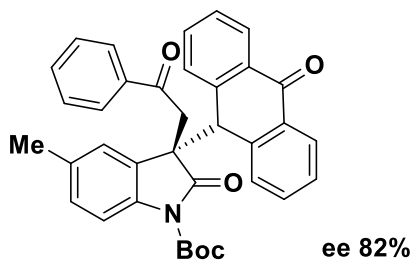

The ee determined by chiral HPLC; CHIRALPAK IA (4.6 mm  $\phi$ ×250 mmL); hexane/2-propanol 76/24; flow rate 0.8 ml/min; temp 25 °C; detection UV 210 nm.

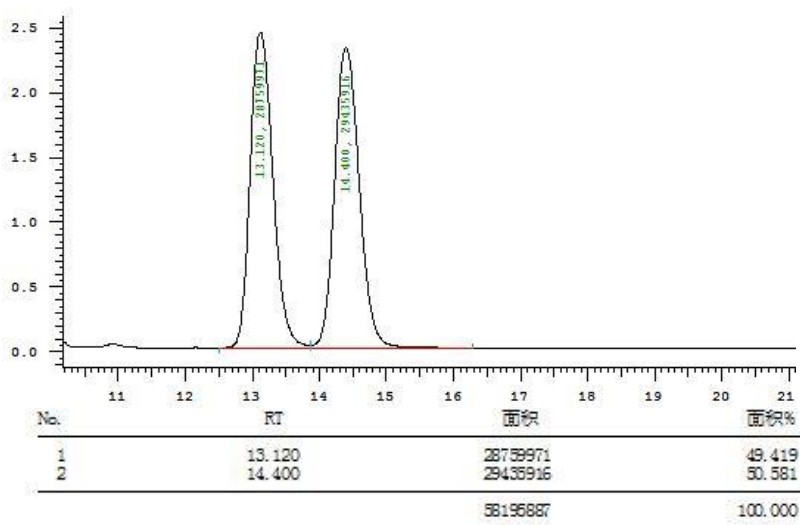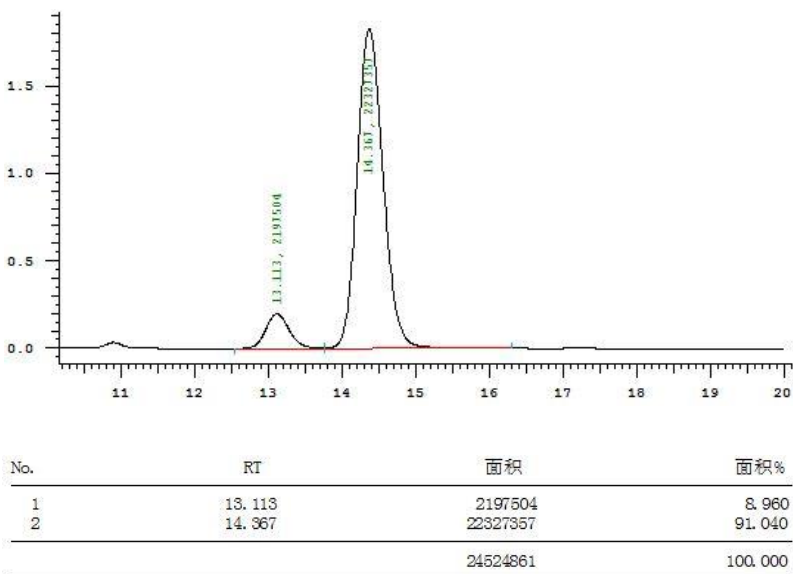

**tert-butyl (S)-5-methoxy-2-oxo-3-(2-oxo-2-phenylethyl)-3-(10-oxo-9,10-dihydroanthracen-9-yl)indoline-1-carboxylate ((S)-4i)**

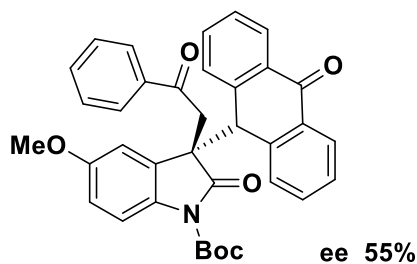

The ee determined by chiral HPLC; CHIRALPAK IA (4.6 mm  $\phi$ ×250 mmL); hexane/2-propanol 76/24; flow rate 0.8 ml/min; temp 25 °C; detection UV 210 nm.

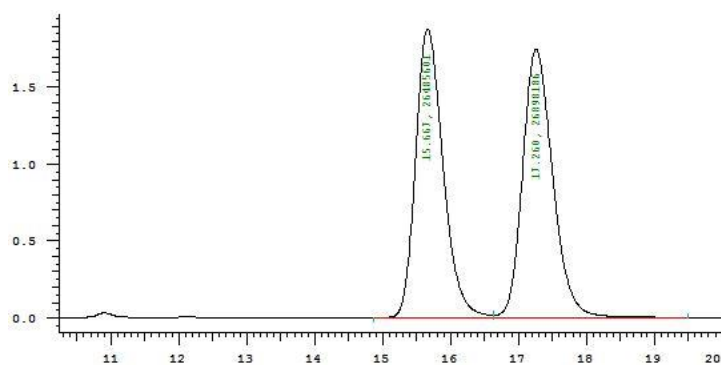

| No. | RT     | 面积       | 面积%     |
|-----|--------|----------|---------|
| 1   | 15.667 | 26485601 | 49.614  |
| 2   | 17.260 | 26898186 | 50.386  |
|     |        |          | 100.000 |

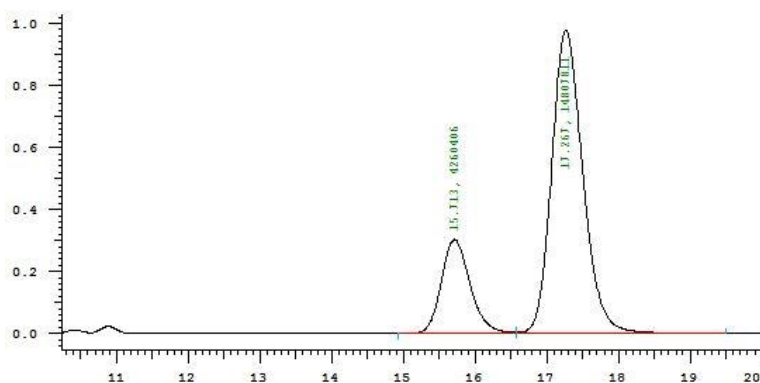

| No. | RT     | 面积       | 面积%     |
|-----|--------|----------|---------|
| 1   | 15.713 | 4260406  | 22.343  |
| 2   | 17.267 | 14807811 | 77.657  |
|     |        |          | 100.000 |

ethyl (S)-2-oxo-3-(2-oxo-2-phenylethyl)-3-(10-oxo-9,10-dihydroanthracen-9-yl)indoline-1-carboxylate ((S)-4j)

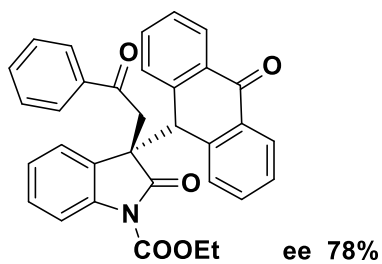

The ee determined by chiral HPLC; CHIRALPAK IC (4.6 mm  $\phi$ ×250 mmL); hexane/2-propanol 70/30; flow rate 0.8 ml/min; temp 25 °C; detection UV 210 nm.

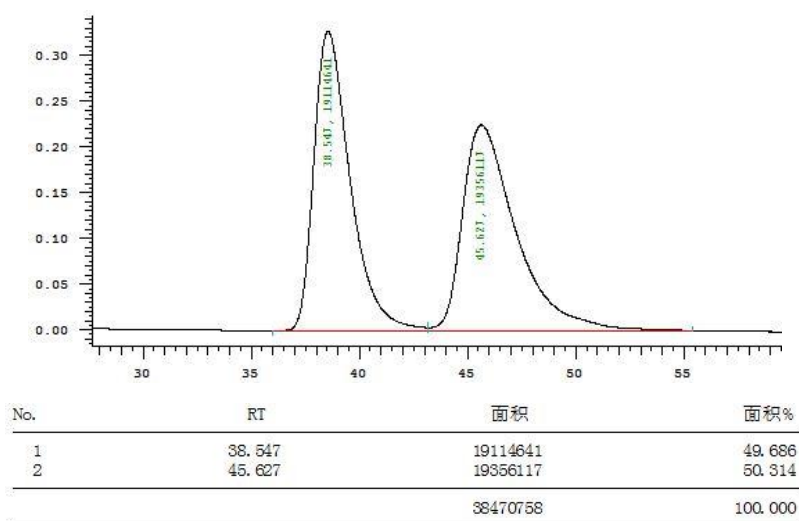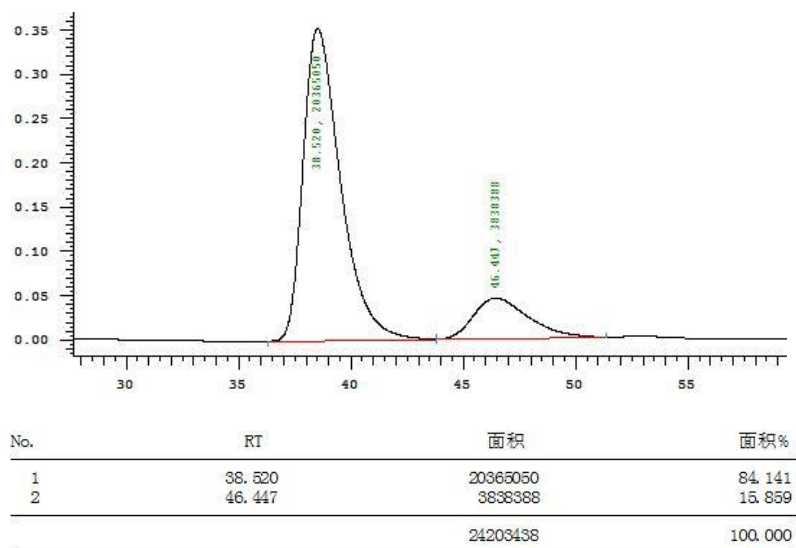

**(S)-1-acetyl-3-(2-oxo-2-phenylethyl)-3-(10-oxo-9,10-dihydroanthracen-9-yl)indolin-2-one**  
**((S)-4k)**

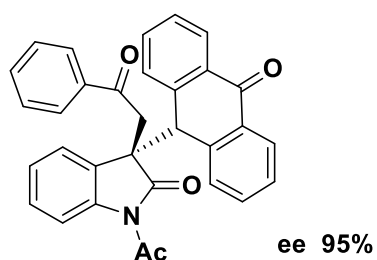

The ee determined by chiral HPLC; CHIRALPAK OD-H (4.6 mm  $\phi$   $\times$  250 mmL); hexane/2-propanol 76/24; flow rate 0.8 ml/min; temp 25  $^{\circ}$ C; detection UV 206 nm.

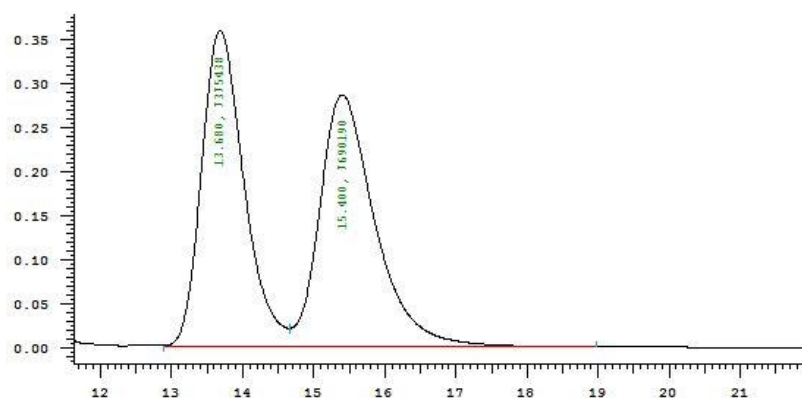

| No. | RT     | 面积       | 面积%     |
|-----|--------|----------|---------|
| 1   | 13.680 | 7375438  | 48.955  |
| 2   | 15.400 | 7690190  | 51.045  |
|     |        | 15065628 | 100.000 |

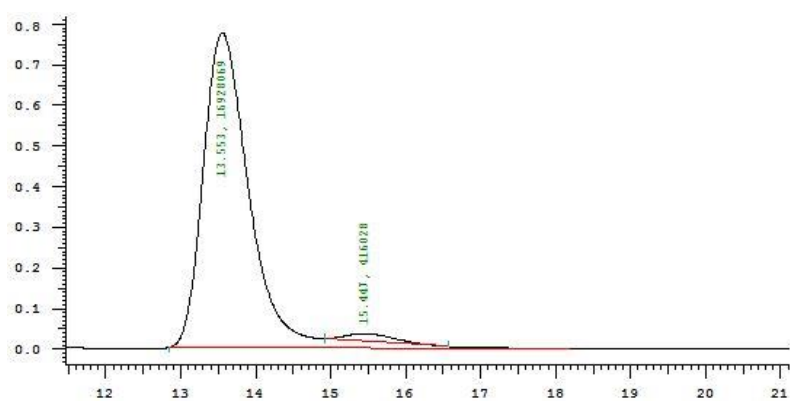

| No. | RT     | 面积       | 面积%     |
|-----|--------|----------|---------|
| 1   | 13.553 | 16928069 | 97.601  |
| 2   | 15.447 | 416028   | 2.399   |
|     |        | 17344097 | 100.000 |

## 6. X-Ray Crystal Structures for 3d and 4g

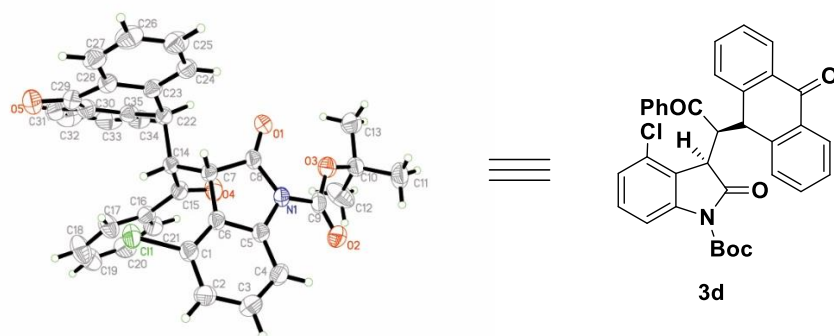

(Displacement ellipsoids are drawn at the 50% probability level)

|                                   |                                                                                                           |
|-----------------------------------|-----------------------------------------------------------------------------------------------------------|
| CCDC number                       | 1432612                                                                                                   |
| Identification code               | 3d                                                                                                        |
| Empirical formula                 | C <sub>35</sub> H <sub>28</sub> ClNO <sub>5</sub>                                                         |
| Formula weight                    | 578.03                                                                                                    |
| Temperature                       | 293(2) K                                                                                                  |
| Wavelength                        | 1.54184 Å                                                                                                 |
| Crystal system                    | Monoclinic                                                                                                |
| Crystal description               | Block                                                                                                     |
| Crystal colour                    | Colorless                                                                                                 |
| Space group                       | P 21/c                                                                                                    |
| Unit cell dimensions              | a = 15.0110(17) Å    α = 90.00 °<br>b = 9.7516(8) Å    β = 120.444(8) °<br>c = 23.371(3) Å    γ = 90.00 ° |
| Volume                            | 2949.4(6) Å <sup>3</sup>                                                                                  |
| Z                                 | 4                                                                                                         |
| Density (calculated)              | 1.302 Mg/m <sup>3</sup>                                                                                   |
| Absorption coefficient            | 1.505 mm <sup>-1</sup>                                                                                    |
| F(000)                            | 1208                                                                                                      |
| Crystal size                      | 0.11 x 0.12 x 0.12 mm <sup>3</sup>                                                                        |
| Theta range for data collection   | 3.42 to 67.24 °                                                                                           |
| Index ranges                      | -14 ≤ h ≤ 17, -10 ≤ k ≤ 11, -27 ≤ l ≤ 27                                                                  |
| Reflections collected             | 17500                                                                                                     |
| Independent reflections           | 5291 [R(int) = 0.0803]                                                                                    |
| Data / restraints / parameters    | 5291 / 0 / 383                                                                                            |
| Goodness-of-fit on F <sup>2</sup> | 1.152                                                                                                     |
| Final R indices [I > 2σ(I)]       | R1 = 0.0788, wR2 = 0.2118                                                                                 |
| R indices (all data)              | R1 = 0.1144, wR2 = 0.2821                                                                                 |
| Largest diff. peak and hole       | 0.348 and -0.483 e.Å <sup>-3</sup>                                                                        |

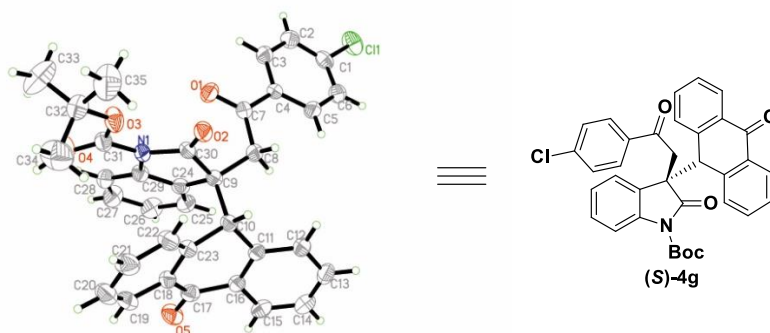

(Displacement ellipsoids are drawn at the 50% probability level)

|                                   |                                                                                                             |
|-----------------------------------|-------------------------------------------------------------------------------------------------------------|
| CCDC number                       | 1432547                                                                                                     |
| Identification code               | (S)-4g                                                                                                      |
| Empirical formula                 | C <sub>35</sub> H <sub>28</sub> ClNO <sub>5</sub>                                                           |
| Formula weight                    | 578.03                                                                                                      |
| Temperature                       | 293(2) K                                                                                                    |
| Wavelength                        | 1.54184                                                                                                     |
| Crystal system                    | Monoclinic                                                                                                  |
| Crystal description               | Block                                                                                                       |
| Crystal colour                    | Colorless                                                                                                   |
| Space group                       | P 21                                                                                                        |
| Unit cell dimensions              | a = 9.6470(9) Å    α = 90.00 °<br>b = 15.6825(15) Å    β = 100.860(10) °<br>c = 9.8683(11) Å    γ = 90.00 ° |
| Volume                            | 1466.2(3) Å <sup>3</sup>                                                                                    |
| Z                                 | 2                                                                                                           |
| Density (calculated)              | 1.309 Mg/m <sup>3</sup>                                                                                     |
| Absorption coefficient            | 1.514                                                                                                       |
| F(000)                            | 604                                                                                                         |
| Crystal size                      | 0.11 x 0.12 x 0.11 mm <sup>3</sup>                                                                          |
| Theta range for data collection   | 5.8740 to 54.6660 °                                                                                         |
| Index ranges                      | -11 ≤ h ≤ 7, -18 ≤ k ≤ 18, -11 ≤ l ≤ 11                                                                     |
| Reflections collected             | 9196                                                                                                        |
| Independent reflections           | 5094 [R(int) = 0.0598]                                                                                      |
| Data / restraints / parameters    | 5094 / 1363 / 383                                                                                           |
| Goodness-of-fit on F <sup>2</sup> | 1.055                                                                                                       |
| Final R indices [I > 2σ(I)]       | R1 = 0.0596, wR2 = 0.1063                                                                                   |
| R indices (all data)              | R1 = 0.1032, wR2 = 0.1362                                                                                   |
| Largest diff. peak and hole       | 0.919 and -0.412 e.Å <sup>-3</sup>                                                                          |
